# Supplementary material
Source: publisher figshare collection journal article supplement (https://tandf.figshare.com/ndownloader/files/21492609)
Supplement: Supplementary file 1 [file 21492609]

**Local anaesthetic potential, Metabolic profiling, Molecular docking and In silico**

**ADME studies of *Ocimum forskolei*, Family *Lamiaceae***

Eman Maher Zahran<sup>a</sup>, Usama Ramadan Abdelmohsen<sup>a,b</sup>, Mahmoud. M. Shalash<sup>c</sup>, M. Alaraby Salem<sup>c</sup>, Hany Ezzat Khalil<sup>d</sup>, Samar Yehia Desoukey<sup>b</sup>, Mostafa Ahmed Fouad<sup>b</sup>, Markus Krischke<sup>e</sup>, Martin Mueller<sup>e</sup>, and Mohamed Salah Kamel<sup>b</sup>

<sup>a</sup>Department of Pharmacognosy, Faculty of Pharmacy, Deraya University, Universities Zone, 61111 New Minia City, Egypt.

<sup>b</sup>Department of Pharmacognosy, Faculty of Pharmacy, Minia University, 61519 Minia, Egypt.

<sup>c</sup>Department of Pharmaceutical Chemistry, Faculty of Pharmacy, October University of Modern Sciences and Arts (MSA), Giza, Egypt.

<sup>d</sup>Department of Pharmaceutical Sciences, College of Clinical Pharmacy, King Faisal University, 31982, Al-Ahsa, Saudi Arabia.

<sup>e</sup>Julius-von-Sachs-Institute of Biosciences, Biocenter, Pharmaceutical Biology, University of Würzburg, Würzburg, Germany.

**\*Corresponding author:** Eman Maher Zahran, [emanzahran84@yahoo.com](mailto:emanzahran84@yahoo.com)

## Abstract

The present study aimed to detect the bioactive metabolites from *Ocimum forskolei* aerial parts which are responsible for the local anaesthetic activity of the ethyl acetate fraction. Following a bioassay-guided fractionation, twelve compounds were dereplicated from the ethyl acetate fraction which was the most potent one with a mean onset of action ( $1.43 \pm 0.07^{****}$ ) min compared to tetracaine as a positive control ( $1.37 \pm 0.07^{****}$ ) min. These compounds, along with seven other compounds (isolated by diverse chromatographic techniques) were subjected to a molecular docking study to declare the top scoring compounds predicted to be responsible for such activity. The results highlighted Rabdosiin and Apigenin-7-O-rutinoside as the main bioactive leaders of the local anaesthesia *via* forming multiple H- bonding with the sodium ion channels leading to their blockade and loss of pain sensation, which strongly supports the use of *O. forskolei* as a local anaesthetic agent.

**Keywords:** *Ocimum forskolei*, local anaesthetic, metabolomic profiling, phenolic compounds, molecular docking.

## Experimental

### Plant material

Leaves and stems of *O. forskolei* were collected in September 2016 from the National Garden of Jazan, KSA. Authentication of plant was established by Prof. Dr. Mahmoud Abdelhady Hassan, Professor of Horticulture, Faculty of Agriculture, Minia University. A voucher specimen (Mn-ph-Cog-038) was kept in the herbarium of Pharmacognosy Department, Faculty of Pharmacy, Minia university, Minia, Egypt.

### Sample preparation

The air dried, powdered leaves and stems (8 kg) were extracted by maceration with 95% ethanol at room temperature, yielding 400 g of crude extract which was suspended in the least amount of distilled water to obtain an aqueous solution successively partitioned with petroleum ether, dichloromethane (DCM), and ethyl acetate using a separating funnel. The organic phase in each step was separately evaporated under reduced pressure to afford the corresponding fractions: Fr.I (120 g), fr.II(35 g) and fr.III (32 g), respectively. The remaining mother liquor was then

concentrated to give the aqueous fraction fr.IV. All the resulting fractions were kept at 4° C for further phytochemical and biological investigations.

### ***Animal model***

This study was conducted on a population of fully grown *Bufo regularis* frogs (no attention is paid to weight or sex) in compliance with the guidelines for the care and use of laboratory animals of the National Institute of Health. Frogs were obtained from the pre-clinical animal house, faculty of medicine, Assuit university, Egypt, in which they were housed and bred under standardized conditions. They were allowed free access to food and drinking water. The animals were acclimatized to the environment for one week before commencement of the experiment. All conditions were also made to minimize animal suffering.

### ***Acute toxicity (LD<sub>50</sub>)***

The acute toxicity of the total ethanol extract (TEE) was previously determined (Zahran et al. 2019).

### ***Local anaesthetic study***

The local anaesthetic activity of the TEE and its different fractions from *O. forskolei* Benth. was evaluated by the method described by Chakraborty et al. with slight modification where Tetracaine was used as the standard drug instead of Xylocaine (Chakraborty et al. 2010). The lumbar plexus anaesthesia model in *Xenopus laevis* frogs was used to determine the relative speed of onset of anaesthesia, instead of the wheel method performed on guinea pigs which is more suitable for estimating the degree of anaesthesia and its duration. Assessment of such former parameter is preferable over the latter as such preparation undergoes constant deterioration. The frogs were divided into seven groups (five frogs each) which received the following treatment into the abdominal pouch *via* infiltration:

**Group 1:** -ve Control group, received 0.9 % saline.

**Group 2:** +ve Control group, received 2 % tetracaine

**Group 3:** Total ethanol extract group (20%).

**Group 4:** Petroleum ether fraction group (20%).

89 **Group 5:** Dichloromethane fraction group (20%).

90 **Group 6:** Ethylacetate fraction group (20%).

91 **Group 7:** Aqueous fraction group (20%).

92 They were decerebrated and upper parts of their spinal cords were destroyed down  
 93 to the level of the third vertebra using a pithing needle. The abdominal viscera were  
 94 excised and removed through a transverse incision made just below the sternum  
 95 thereby forming a pouch. The lumbar plexus was exposed carefully without  
 96 damaging it. The frogs were pinned to vertical boards with their legs hanging down.  
 97 The drugs were administered to the frogs in the different groups into the abdominal  
 98 pouch in sufficient volumes (20%) to submerge the lumbar plexus. The left and right  
 99 limbs of the frogs were immersed every minute for a maximum period of 10 s, to  
 100 avoid damaging the sensory nerve-endings by repeated application of stronger acid  
 101 than necessary in beakers containing 0.1(N) HCL and normal saline, respectively.  
 102 Afterwards the feet were rinsed in water. The time taken by the animals failing to  
 103 withdraw their feet from the acid beaker was recorded as the “onset of local  
 104 anesthetic action” (Chakraborty, et al. 2010)

105 **Statistical analysis** Data were expressed as mean  $\pm$  S.E.M (n = 5). One-way analysis of  
 106 variance (ANOVA) followed by Dunnett's test was applied. Graph Pad Prism 5 was  
 107 used for statistical calculations (Graph pad Software, San Diego, California, USA).  
 108 Results were regarded as significant as follows: \*P<0.05, \*\*P<0.01, \*\*\*P<0.001,  
 109 \*\*\*\*P<0.0001 (Table S1).

#### 110 ***LC-HR-MS analysis***

111 Acquity Ultra Performance Liquid Chromatography system coupled to a Synapt G2  
 112 HDMS quadrupole time-of-flight hybrid mass spectrometer (Waters, Milford, USA).  
 113 Chromatographic separation was carried out on a BEH C18 column (2.1  $\times$  100 mm,  
 114 1.7  $\mu$ m particle size; Waters, Milford, USA) with a guard column (2.1 x5 mm, 1.7  $\mu$ m  
 115 particle size) and a linear binary solvent gradient of 0%–100% eluent B over 6 min at  
 116 a flow rate of 0.3 mL min<sup>-1</sup>, using 0.1% formic acid in water (v/v) as solvent A and  
 117 acetonitrile as solvent B. The injection volume was 2  $\mu$ L and the column temperature  
 118 was 40°C. To convert the raw data into separate positive and negative ionization  
 119 files, Ms converter software was used Using MZmine 2.12 as framework for MS data  
 120 differential analysis were, the raw data were imported by selecting the

ProteoWizard-converted positive or negative files in mzML format (Tawfike et al. 2019) (Ibrahim et al. 2018). (DNP and METLIN databases were used for dereplicating each  $m/z$  ion peak (using RT and  $m/z$  threshold of  $\pm 5$  ppm), which provided the putative identities of all metabolomes in the total extract (s) in details (Elsayed et al. 2018)

### ***Phytochemical study (Isolation and purification of compounds)***

A part of the ethyl acetate fraction was subjected to VLC fractionation on a silica gel column. Elution was performed using DCM-MeOH gradient mixtures in the order of increasing polarities (20, 30, 40, 50 and 100%). The effluents were collected in fractions (100 ml each); each fraction was concentrated and monitored by TLC. Similar fractions were grouped together and concentrated under reduced pressure to provide four major fractions (I - IV). Fraction I (1.4 g) was further fractionated on a silica gel column (CC) using DCM-MeOH gradient mixtures to yield four subfractions (I-1, I-2, I-3 & I-4). Subfraction I.1 (140 mg) was fractionated on silica gel CC followed by paper chromatography to yield compound **13** (15 mg). Fraction III (3 g) was subjected to silica gel CC employing gradient elution with DCM-MeOH and the effluents were collected in fractions (500 ml each) providing 5 subfractions (III-1 – III-5). Compound **14** (25 mg) was isolated from subfraction III-1 (170 mg) using silica gel CC with DCM-MeOH 6-4 isocratic elution. Compounds **15** (17 mg) and **16** (9 mg) followed the same behaviour and were isolated from subfraction III-2 (110 mg) with DCM-MeOH 5-5 isocratic elution. Subfraction III-3 (2.1 g) yielded compounds **17** (6 mg) and **18** (2.3 mg) employing EtOAc-MeOH gradient elution on different silica gel columns. Subfraction III-4 gave compound **19** (15 mg). All compounds were identified by different NMR spectroscopic analysis and comparison with literature (Figure 2B, S2 – S8).

### ***ADME-toxicity***

It was predicted for the most active compounds using the online platform of SwissADME (Daina et al. 2017). The summary of data is provided in Table S3.

### ***Molecular docking analysis***

Sodium channels located on cell membranes and involved in pain sensation *via* neuro transmission are used to study the local anaesthetic action of our compounds.

The docking analysis in brief was concerned with the protein structure of the sodium channel and its active site which were adopted based on the work of Tikhonov and Zhorov (Tikhonov et al. 2017). Visualization and docking were performed using the MOE software (CCGI 2016) with default parameters for rigid-body docking. Docking was performed for the 19 compounds identified in the extract, as well as for tetracaine and lidocaine as standards, and their docking scores were provided in Table S4.

## Results and discussion

The results mentioned in Table S1 clearly showed that all the different fractions together with the TEE significantly exhibited a local anaesthetic action following the lumbar plexus anaesthesia model in frogs, and this effect persisted over the whole observation period (30 min). The ethyl acetate fraction was the highest significant one with a mean onset of action of  $1.43 \pm 0.07^{****}$  min in comparison with tetracaine  $1.37 \pm 0.07^{****}$  min. The ethyl acetate fraction was followed by both the aqueous and the TEE with mean onset of action of  $1.70 \pm 0.07^{****}$  and  $5.77 \pm 0.4^{****}$ ; respectively; while both Pet. ether and DCM fractions exhibited a delayed action but still significant with mean onset of  $19.67 \pm 0.33^{**}$  and  $18.67 \pm 0.67^{**}$ , respectively.

The LC-HR-MS-coupled metabolomic analysis led to identification of 12 different compounds with the predominance of phenolic compounds. The dereplicated compounds which are common among different *Lamiaceae* species are listed in Table S2 with their relevant data.

The phytochemical study resulted in the isolation and identification of 7 compounds; most of them are flavonoids and flavonoid glycosides together with the presence of two caffeic acid derivatives (Figure 2 A & B). They were identified as acacetin which was previously isolated from *O. sanctum* leaves (Gomes et al. 2011) as well as methyl rosmarinate and methyl caffeate which were previously isolated from *O. basilicum* roots (Singh et al. 2018). Didymine was detected in *Clinopodium mexicanum* (Estrada-Reyes et al. 2010) and apigenin-7-O-rutinoside was previously isolated from *Origanum vulgare* (Martins et al. 2014). Prunin was detected in many *Thymus* plants (Leal et al. 2017) while acacetin-7-O-glucoside was precipitated in leaf tissues of different *Mentha* species (Mimica-Dukic et al. 2008).

The molecular docking analysis was performed in an attempt to explain the observed local anaesthetic activity of the ethyl acetate fraction and all docking scores were reported in Table S4.

The compounds were investigated based on their scores and visual inspection of the formed interactions. As shown in figure S9, the active site of the sodium channel is buried in the inner-pore region of the alpha-subunit which is lined by the S6 helix and the p-loop. Within the active site, there are several hydrophobic amino acids, including Phe 315 and Phe 249 with the propensity of  $\pi$  stacking. There are also potential H-bond donors like Lys 250 and Gln 249 along with Ser 315 and Thr 247, which can also act as acceptors.

The interactions formed with the active site of the voltage-gated sodium channel and the two top scoring compounds, rabdosiin and apigenin-7-O-rutinoside, are illustrated in figure 3. Upon examination of the results, it was found that both compounds formed hydrogen bonds as well as arene-H interactions with the sodium channels and these two types of interactions were strong enough to stabilize both compounds in the docked pose. Rabdosiin formed five interactions, two hydrogen bonds; attached to the phenyl rings; with Cys 248 and Ser 315, one hydrogen bond belonging to a carboxylic group which interacted with Thr 248 and the last one through an arene-H interaction with Gln 315 *via* the phenyl ring. Apigenin-7-O-rutinoside formed three interactions with the ion channel, a hydrogen bond *via* the hydroxyl group of glucose moiety with Cys 248, another binding of Asn 315 with the rhamnose moiety and the third one through an arene-H interaction with Leu 319. On the other hand, the analysis of the interactions formed by lidocaine in the binding site of the ion channel showed that it formed similar interactions as the two top scoring compounds expressed in a hydrogen bond between the amide carbonyl group and Gln 249, as well as a  $\pi$ - $\pi$  stacking *via* the phenyl ring of the ligand.

Comparing the docking poses of rabdosiin and apigenin-7-O-rutinoside with that of lidocaine, it was found that the three compounds occupied the same binding pocket although rabdosiin and apigenin-7-O-rutinoside occupied a larger volume of the pocket, which might account for their superior binding scores. All the previous results show both compounds to be the main responsible for the local anaesthetic action of the ethyl acetate fraction.

**Table S1:** Results of local anaesthetic activity of the TEE and different fractions of *O. forskolei*. On plexus anaesthesia in frogs

| Group               | Drug          | Onset of local anaesthetic action (mean $\pm$ SEM) (min) |
|---------------------|---------------|----------------------------------------------------------|
| -ve control         | 0.9 % saline  | 22.00 $\pm$ 0.00                                         |
| +ve control         | 2% tetracaine | 1.37 $\pm$ 0.07****                                      |
| TEE                 | 20 %          | 5.77 $\pm$ 0.40****                                      |
| Petroleum ether fr. | 20 %          | 19.67 $\pm$ 0.33**                                       |
| DCM fr.             | 20 %          | 18.67 $\pm$ 0.67**                                       |
| Ethyl acetate fr.   | 20 %          | 1.43 $\pm$ 0.07****                                      |
| Aqueous fr.         | 20 %          | 1.70 $\pm$ 0.07****                                      |

**Table S2.** A list of dereplicated compounds by metabolomic analysis from ethyl acetate fraction of *O. forskolei*

| Compound            | Acc. Mass | <i>m/z</i> | Mol. formula                                    | Source and Reference                          |
|---------------------|-----------|------------|-------------------------------------------------|-----------------------------------------------|
| Rabdosiin           | 718.15    | 718.15     | C <sub>36</sub> H <sub>30</sub> O <sub>16</sub> | <i>Ocimum basilicum</i> (Flegkas et al. 2019) |
| Protocatechuic acid | 154.03    | 154.03     | C <sub>7</sub> H <sub>6</sub> O <sub>4</sub>    | <i>Ocimum basilicum</i> (Bilal et al. 2012)   |
| Methyl gallate      | 184.04    | 184.03     | C <sub>8</sub> H <sub>8</sub> O <sub>5</sub>    | <i>Ocimum sanctum</i> (Mondal et al. 2009)    |
| Tournefolic acid B  | 312.27    | 312.22     | C <sub>17</sub> H <sub>12</sub> O <sub>6</sub>  | <i>Clinipodium chinense</i> (Yu et al. 2019)  |
| Chlorogenic acid    | 353.08    | 353.10     | C <sub>16</sub> H <sub>18</sub> O <sub>9</sub>  | <i>Ocimum basilicum</i> , (Shoeb et al. 2007) |
| Citrusin C          | 326.14    | 326.12     | C <sub>16</sub> H <sub>22</sub> O <sub>7</sub>  | <i>Ocimum sanctum</i> (Suzuki et al. 2009)    |



|                    |        |        |                                                 |                                                             |
|--------------------|--------|--------|-------------------------------------------------|-------------------------------------------------------------|
| Salvianolic acid F | 314.08 | 314.07 | C <sub>17</sub> H <sub>14</sub> O <sub>6</sub>  | <i>Melissa officinalis</i><br>(Barros et al. 2013)          |
| Dehydrodieugenol B | 326.15 | 327.16 | C <sub>20</sub> H <sub>22</sub> O <sub>4</sub>  | <i>Ocimum sanctum</i><br>(Suzuki, et al. 2009)              |
| Lithospermic acid  | 538.1  | 537.1  | C <sub>27</sub> H <sub>22</sub> O <sub>12</sub> | <i>Ocimum basilicum</i><br>(Tada et al. 1996)               |
| Orientin           | 448.1  | 447.09 | C <sub>21</sub> H <sub>20</sub> O <sub>11</sub> | <i>Ocimum sanctum</i><br>(Sharma et al. 2016)               |
| Rutin              | 610.35 | 609.15 | C <sub>27</sub> H <sub>30</sub> O <sub>16</sub> | <i>Ocimum<br/>kilimandscharicum</i> (Grayer<br>et al. 2002) |
| Rosmanol           | 344.42 | 345.17 | C <sub>20</sub> H <sub>28</sub> O <sub>5</sub>  | <i>Salvia pachyphylla</i><br>(Guerrero et al. 2006)         |

225

226

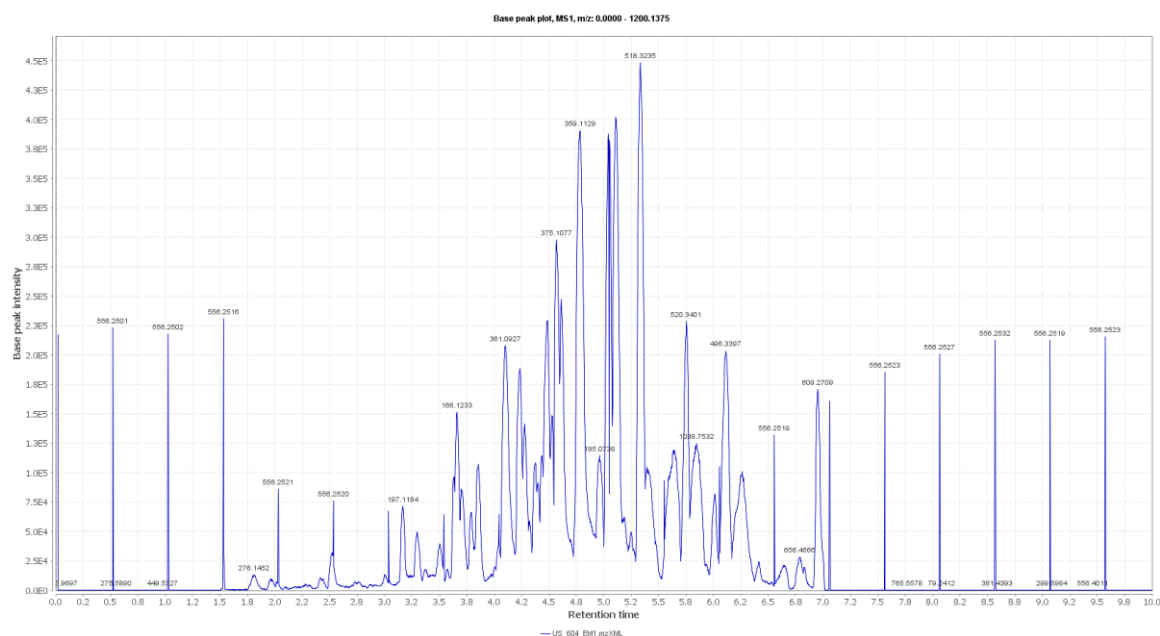

227

228

**Figure S1:** Total ion chromatogram of the ethyl acetate fraction of *O. forskolei*

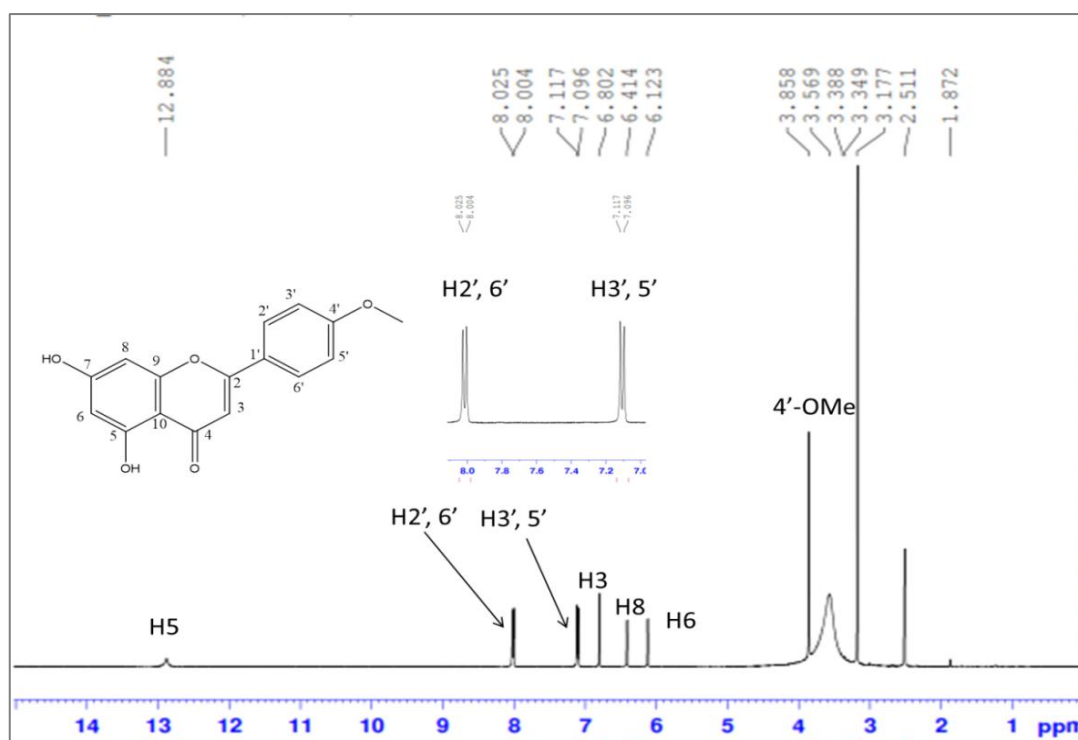

**Figure S2.A:** <sup>1</sup>H-NMR spectrum of acacetin (DMSO-d<sub>6</sub>, 400 MHz)

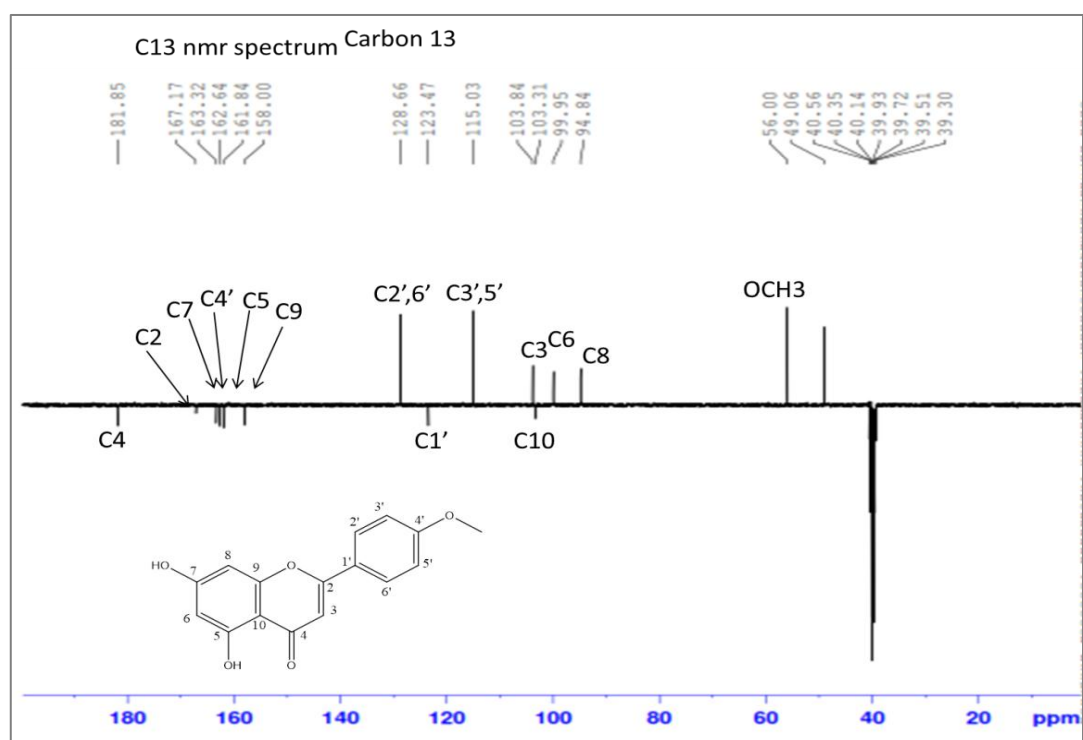

**Figure S2.B:** DEPT-Q spectrum of acacetin (DMSO-d<sub>6</sub>, 100 MHz)

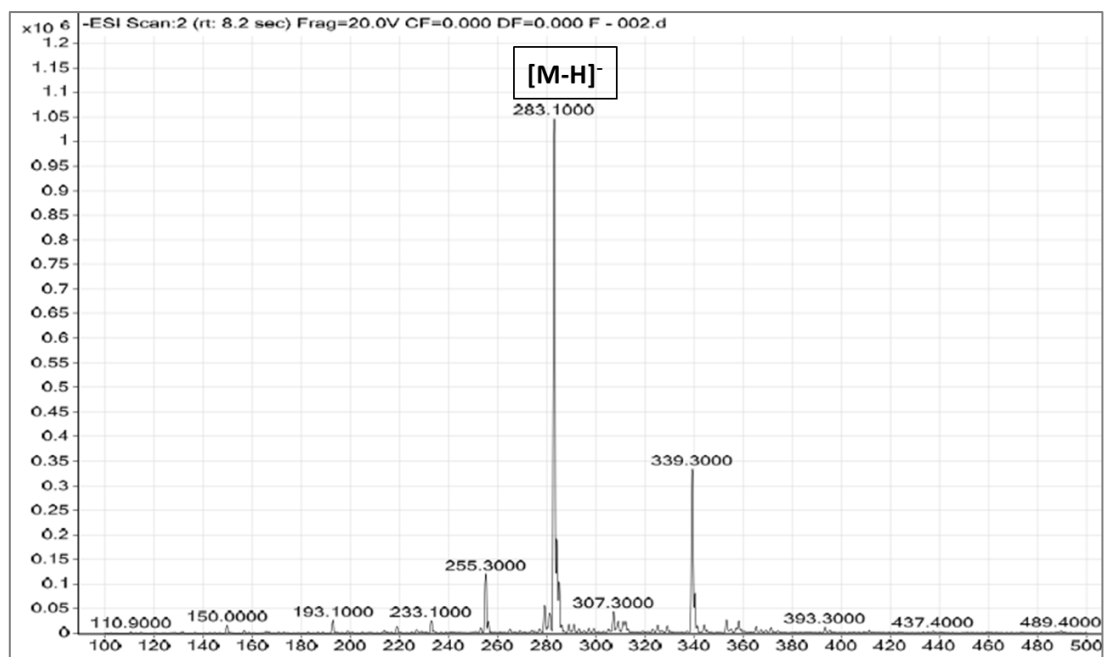

**Figure S2.C:** ESI-MS spectrum of acacetin

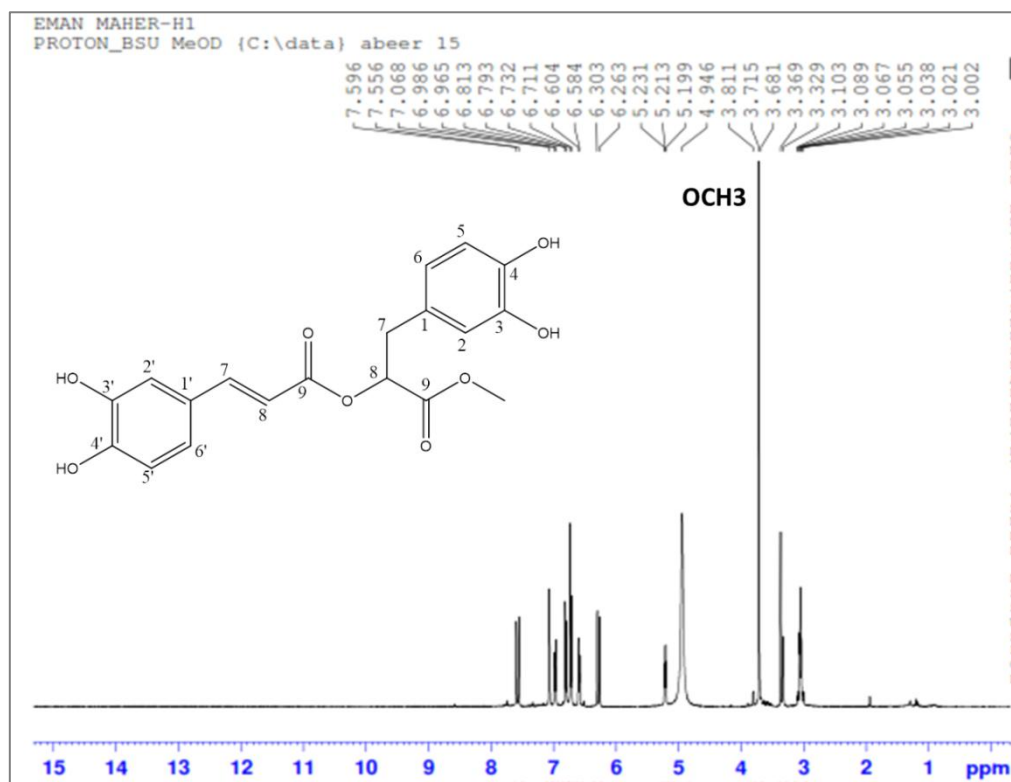

**Figure S3.A:** <sup>1</sup>H-NMR spectrum of methyl rosmarinate (CD<sub>3</sub>OD, 400 MHz)

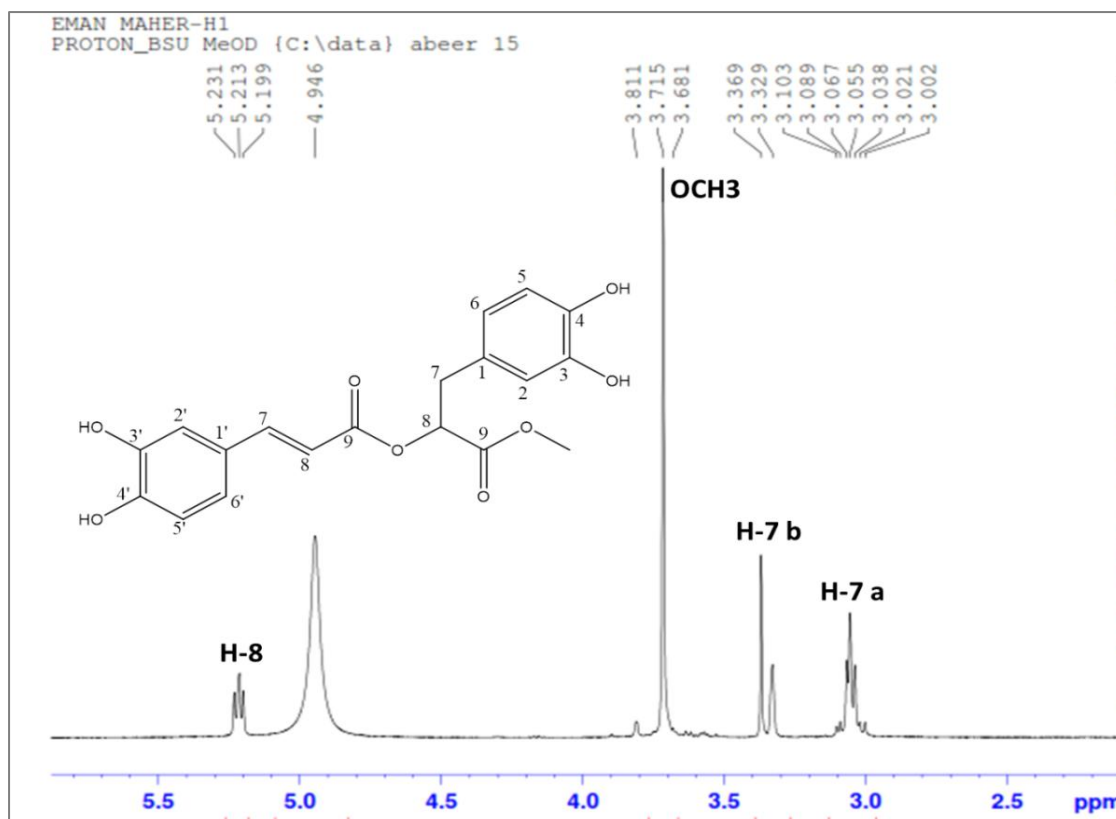

238

239 **Figure S3.B:** Expanded  $^1\text{H}$ -NMR spectrum of methyl rosmarinate ( $\text{CD}_3\text{OD}$ , 400 MHz)

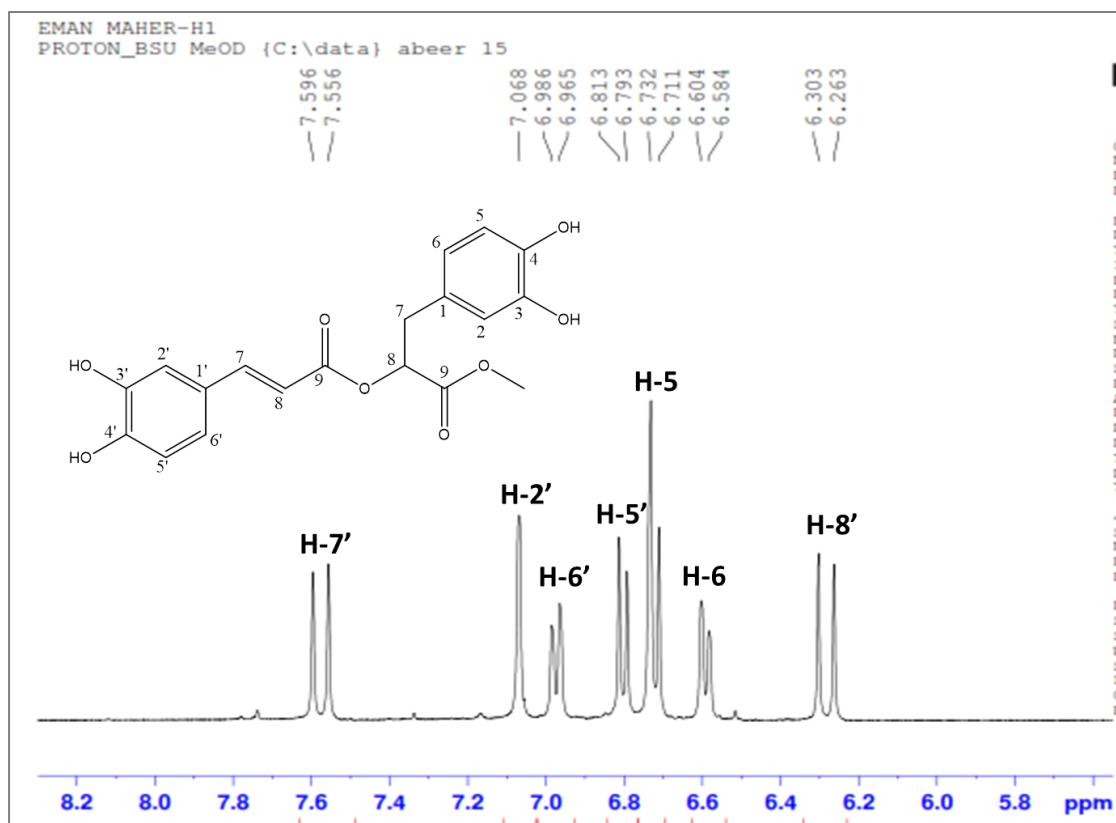

240

241 **Figure S3.C:** Expanded  $^1\text{H}$ -NMR spectrum of methyl rosmarinate ( $\text{CD}_3\text{OD}$ , 400 MHz)

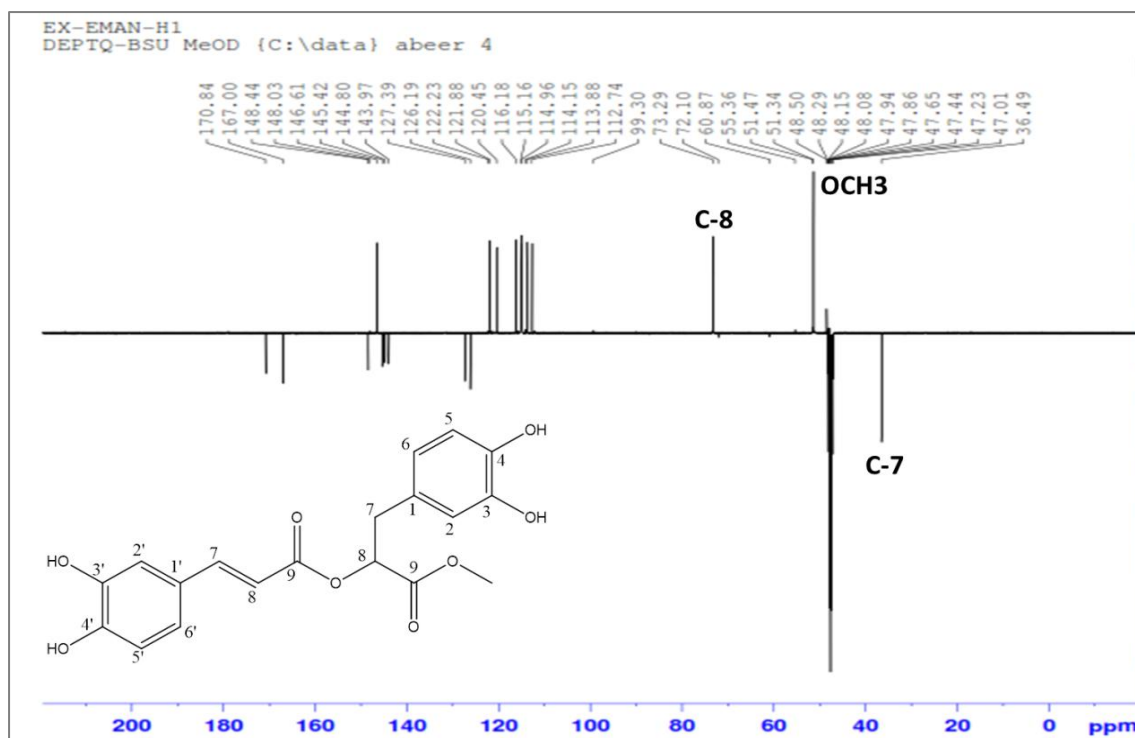

**Figure S3.D:** DEPT-Q spectrum of methyl rosmarinate (CD<sub>3</sub>OD, 100 MHz)

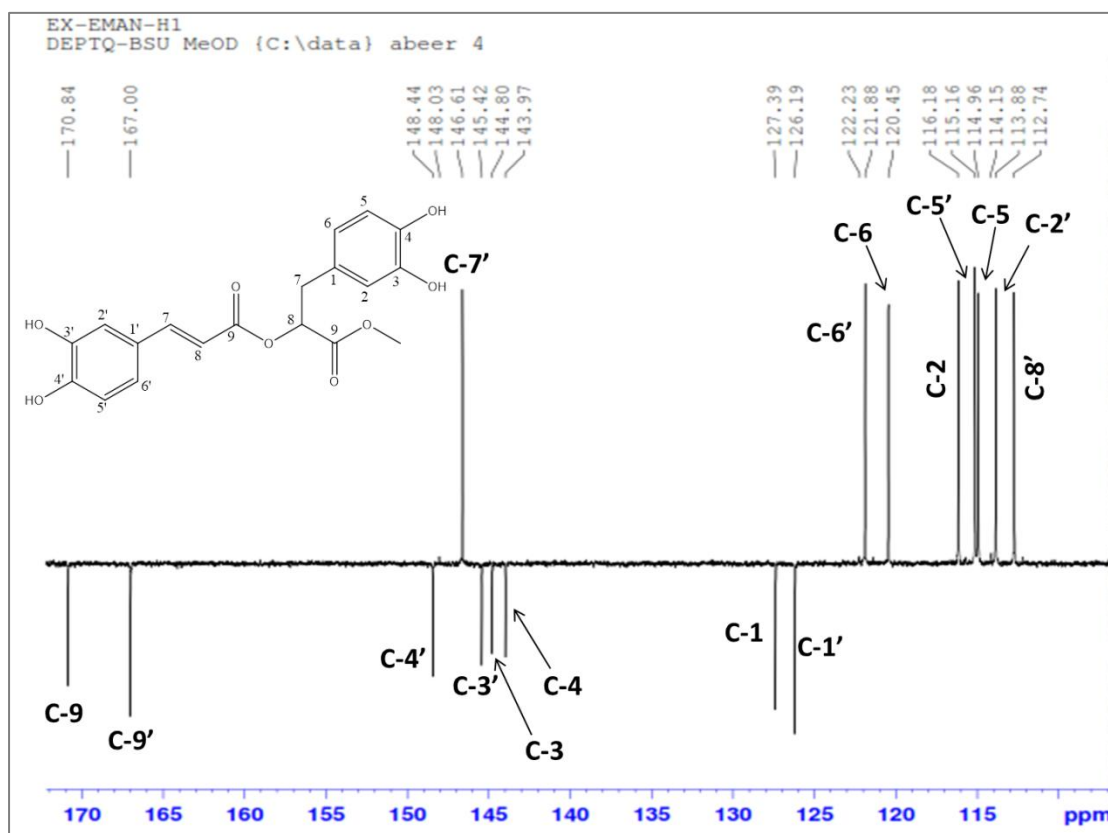

**Figure S3.E:** Expanded DEPT-Q spectrum of methyl rosmarinate (CD<sub>3</sub>OD, 100 MHz)

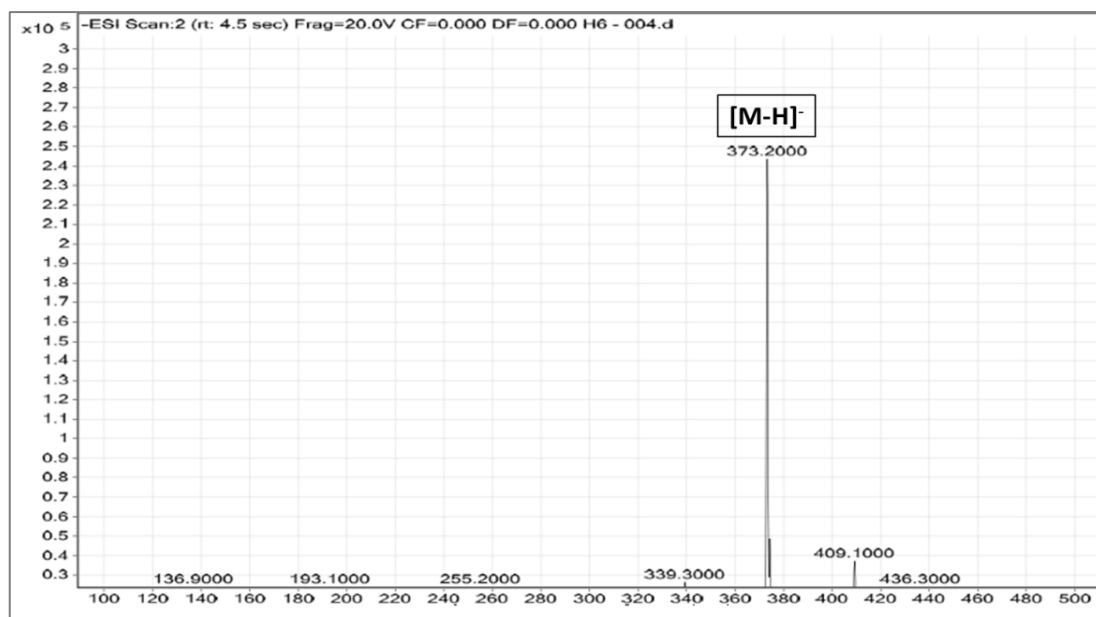

**Figure S3.F:** ESI-MS of methyl rosmarinate

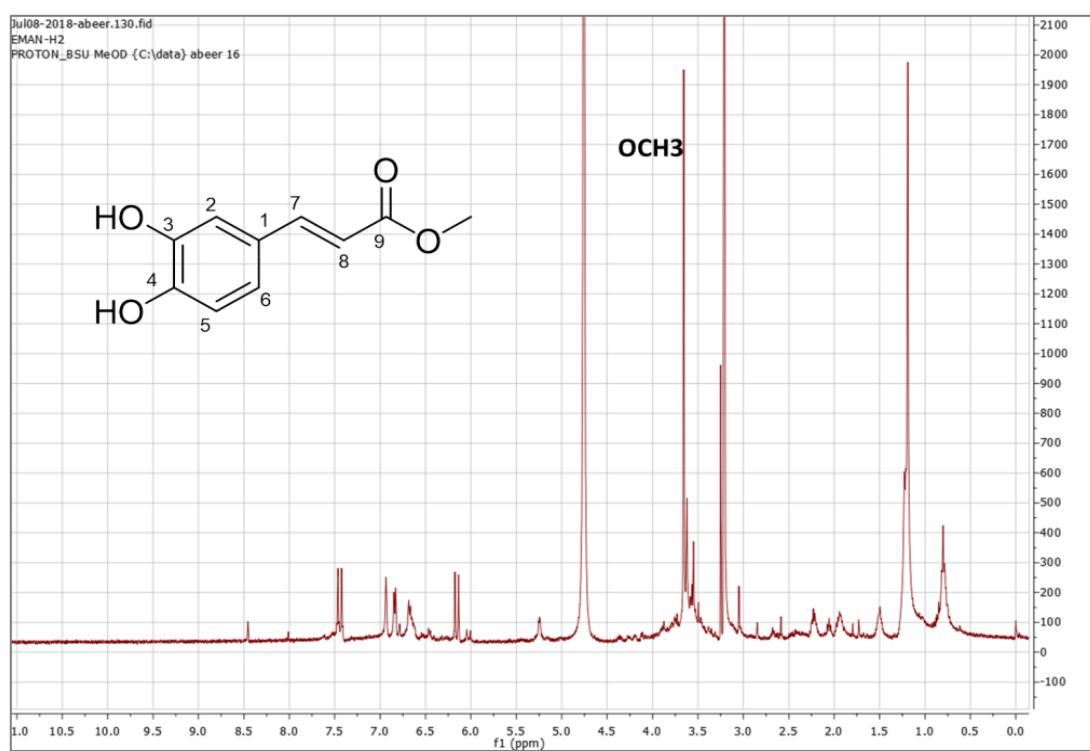

**Figure S4.A:** <sup>1</sup>H-NMR spectrum of methyl caffeate (CD<sub>3</sub>OD, 400 MHz)

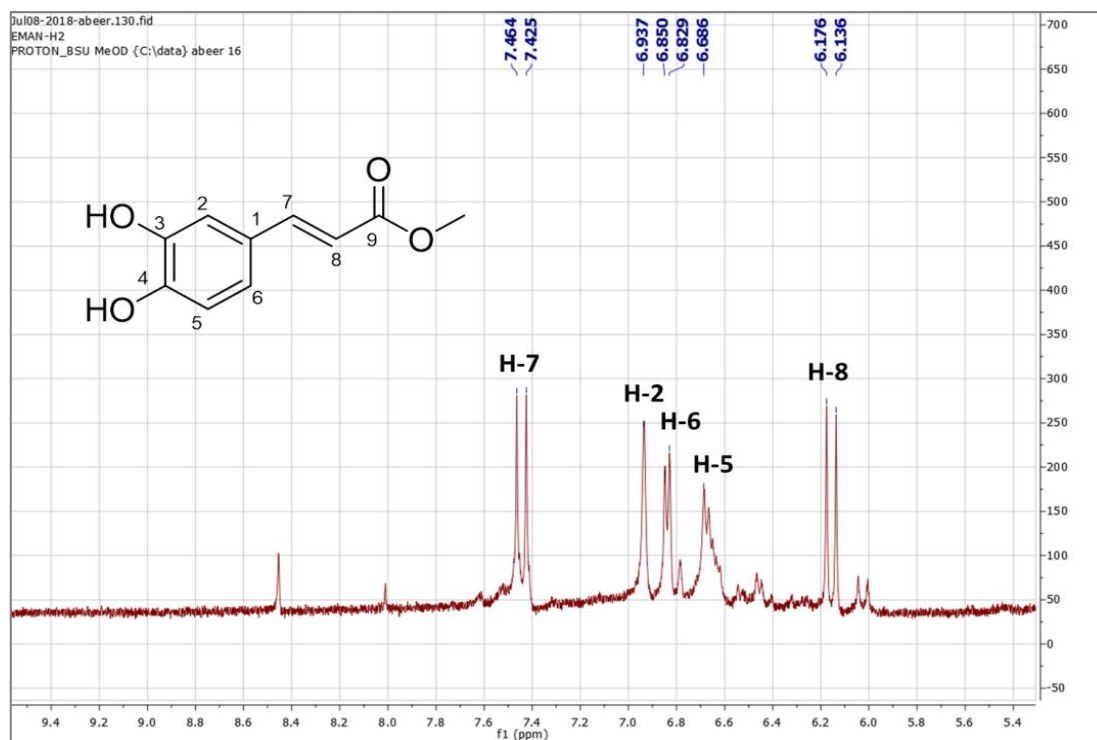

**Figure S4.B:** Expanded  $^1\text{H}$ -NMR spectrum of methyl caffeate ( $\text{CD}_3\text{OD}$ , 400 MHz)

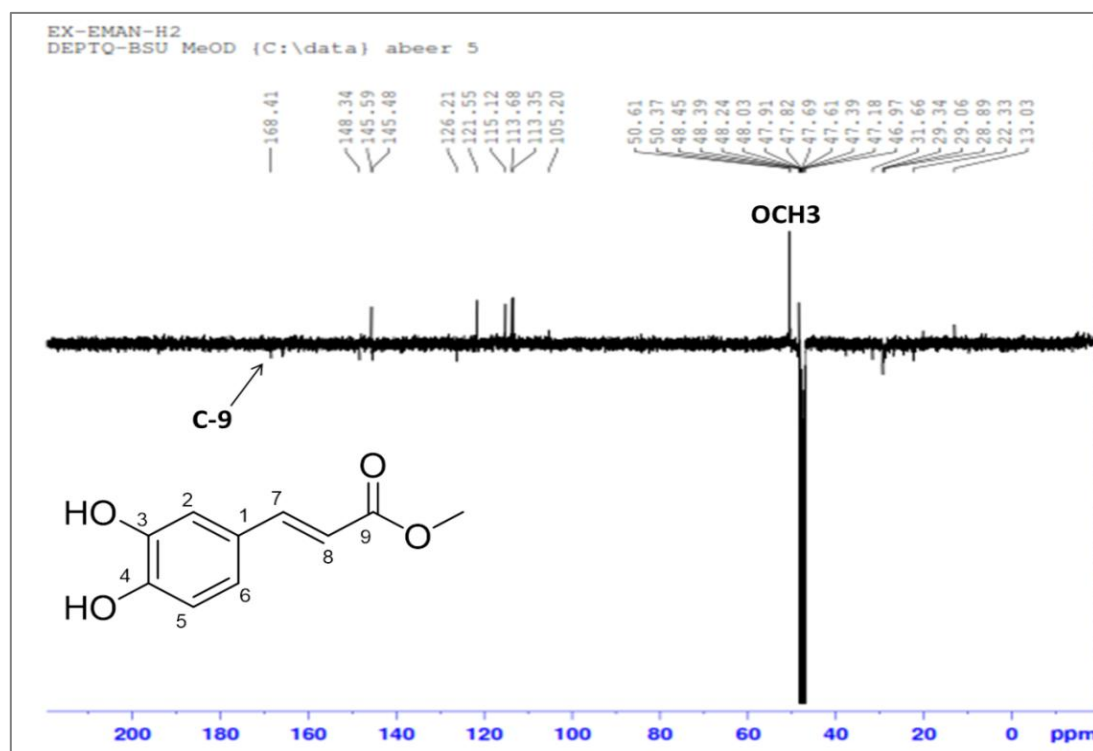

**Figure S4.C:** DEPT-Q spectrum of methyl caffeate ( $\text{CD}_3\text{OD}$ , 100 MHz)

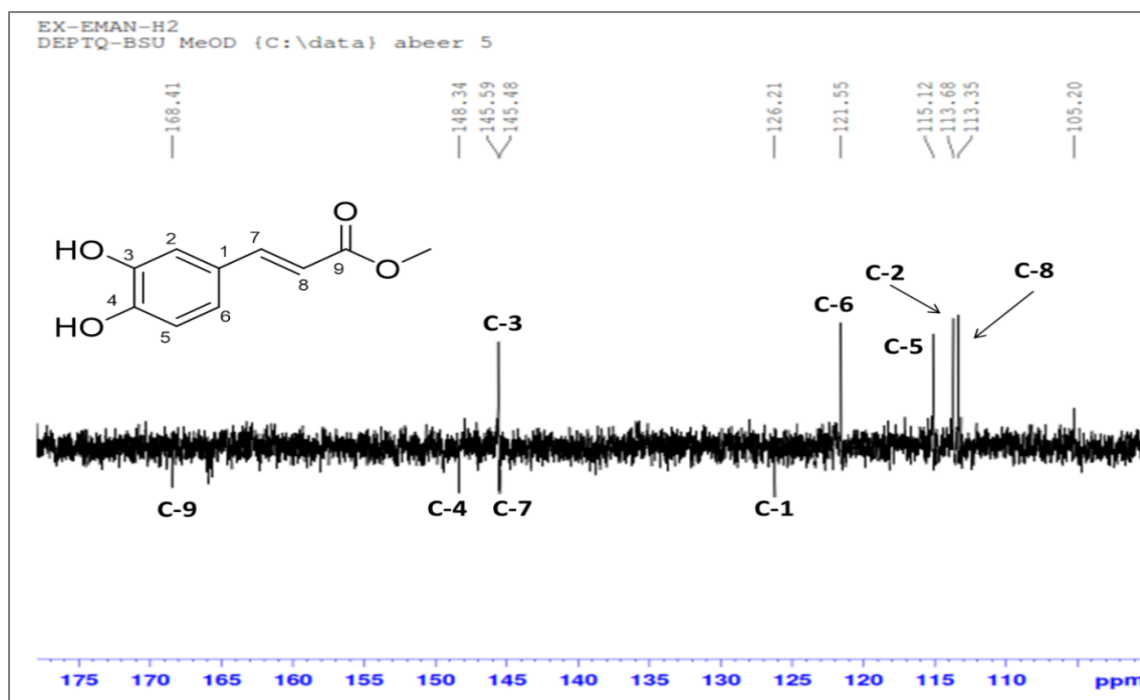

**Figure S4.D:** Expanded DEPT-Q spectrum of methyl caffeate (CD<sub>3</sub>OD, 100 MHz)

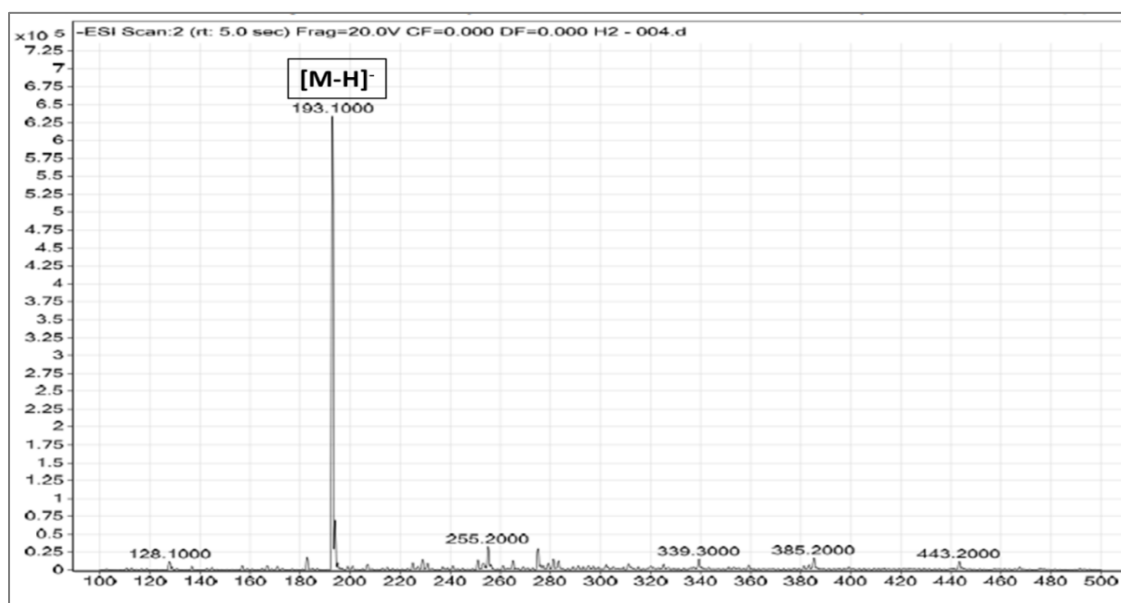

**Figure S4.E:** ESI-MS of methyl caffeate



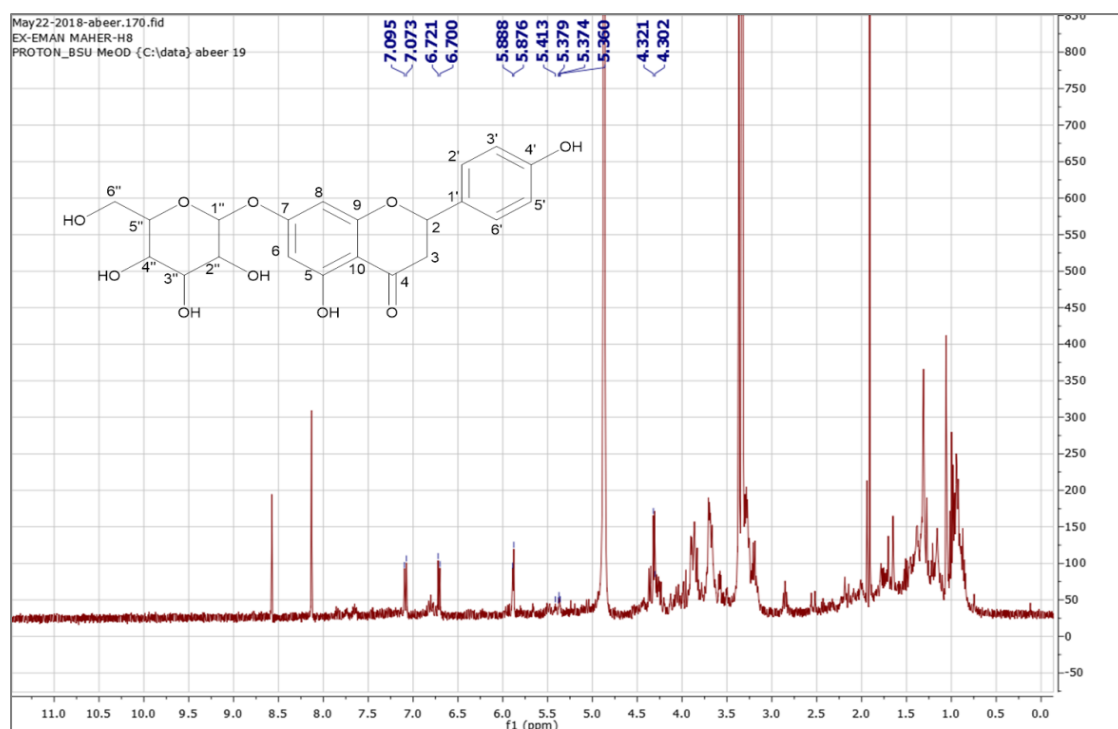

**Figure S5.A:**  $^1\text{H}$ -NMR spectrum of Prunin ( $\text{CD}_3\text{OD}$ , 400 MHz)

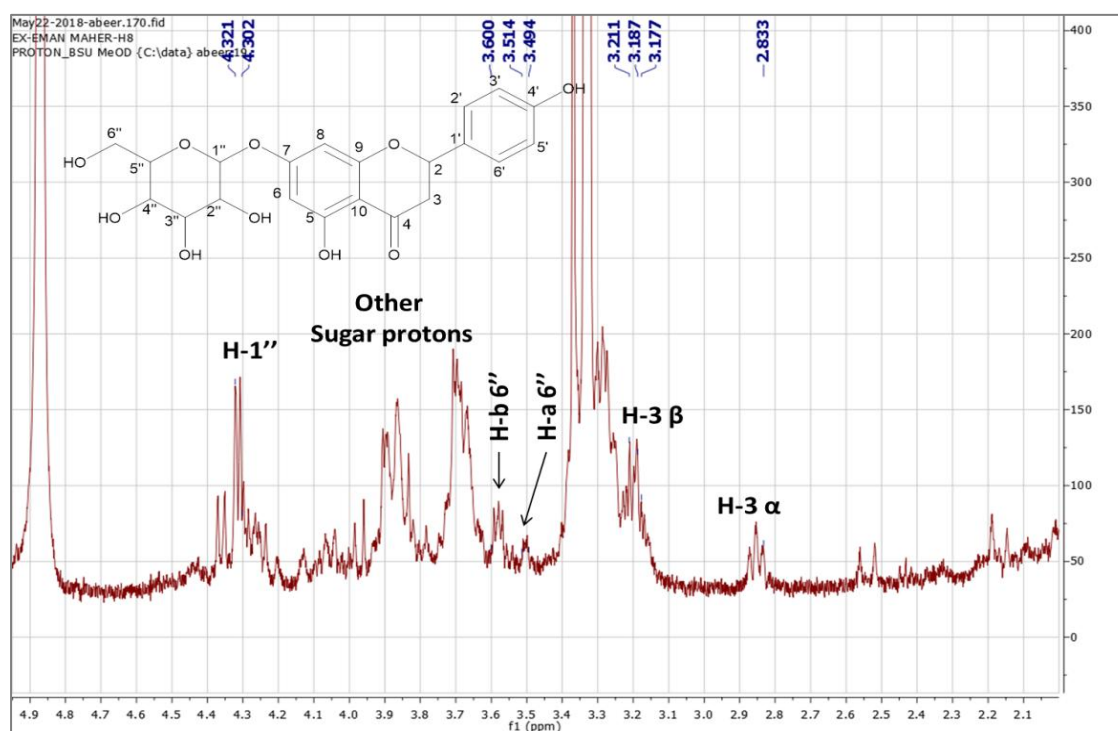

**Figure S5.B:** Expanded  $^1\text{H}$ -NMR spectrum of Prunin ( $\text{CD}_3\text{OD}$ , 400 MHz)

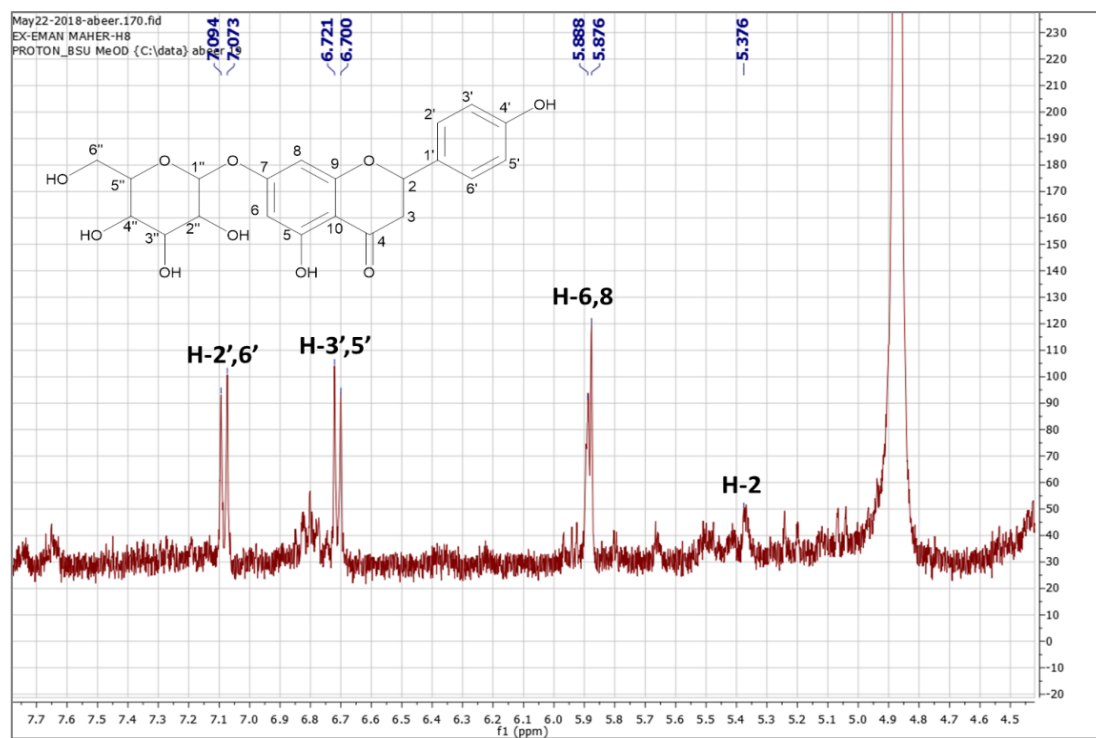

262

263

**Figure S5.C:** Expanded  $^1\text{H}$ -NMR spectrum of Prunin ( $\text{CD}_3\text{OD}$ , 400 MHz)

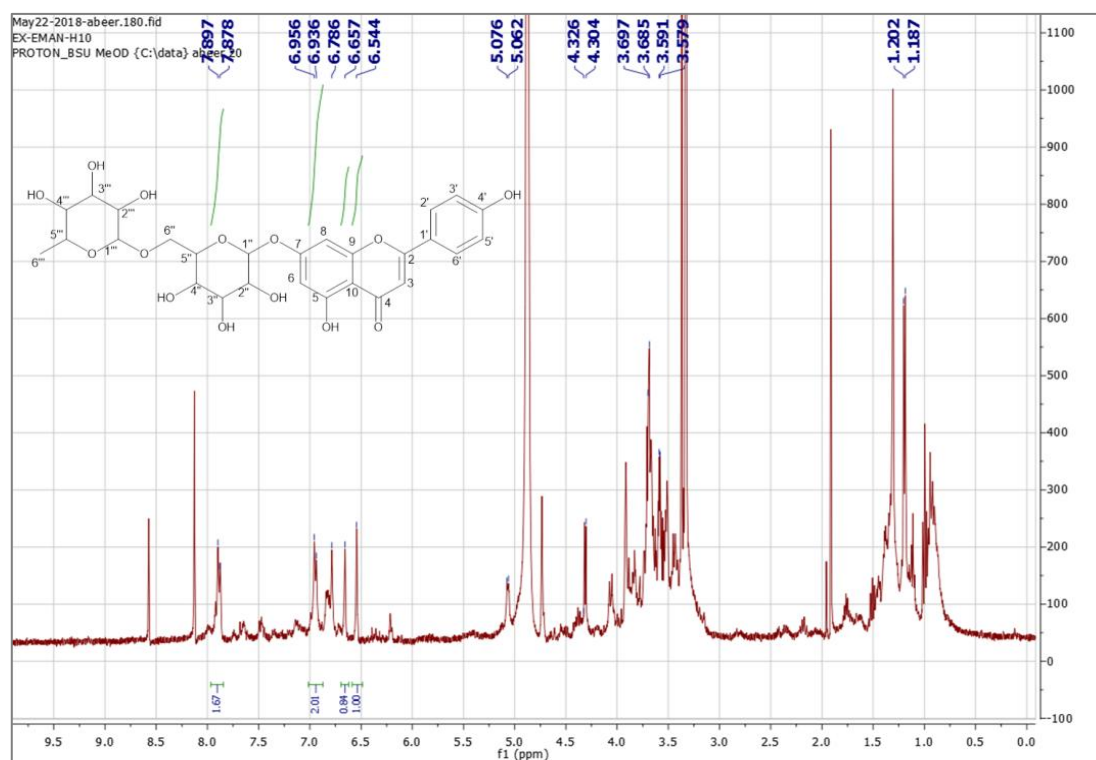

264

265

**Figure S6.A.**  $^1\text{H}$ -NMR spectrum of Apigenin-7-O-rutinoside ( $\text{CD}_3\text{OD}$ , 400 MHz)

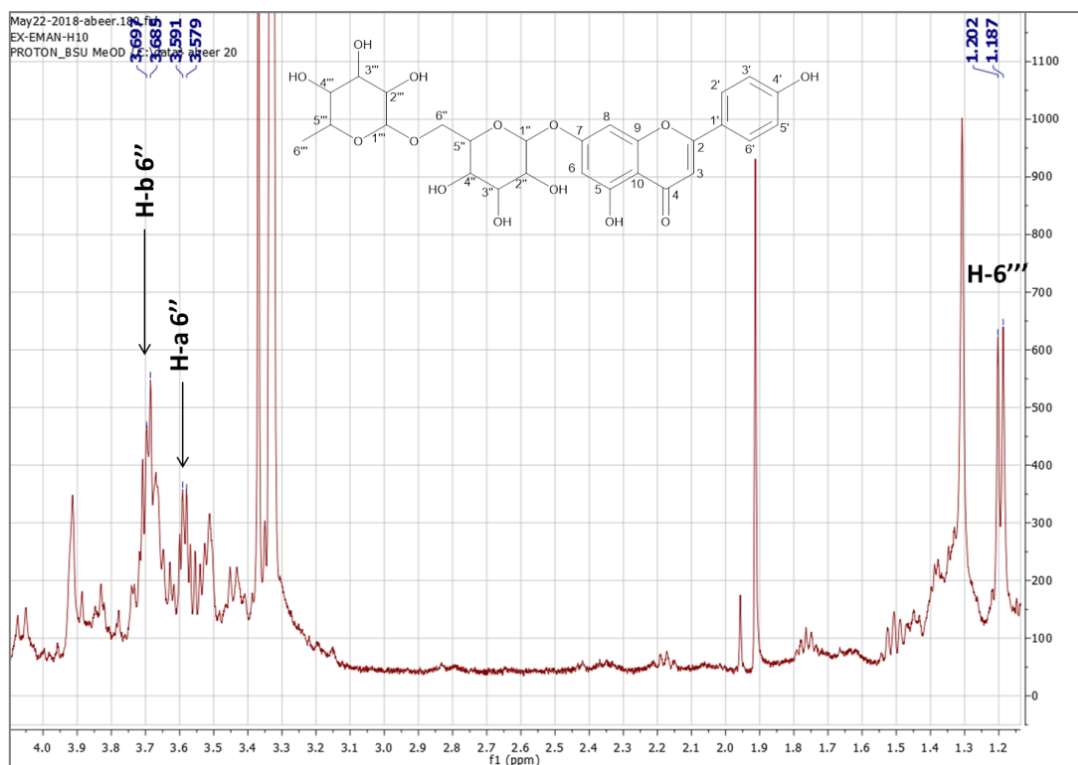

**Figure S6.B:** Expanded  $^1\text{H}$ -NMR spectrum of Apigenin-7-O-rutinoside ( $\text{CD}_3\text{OD}$ , 400 MHz)

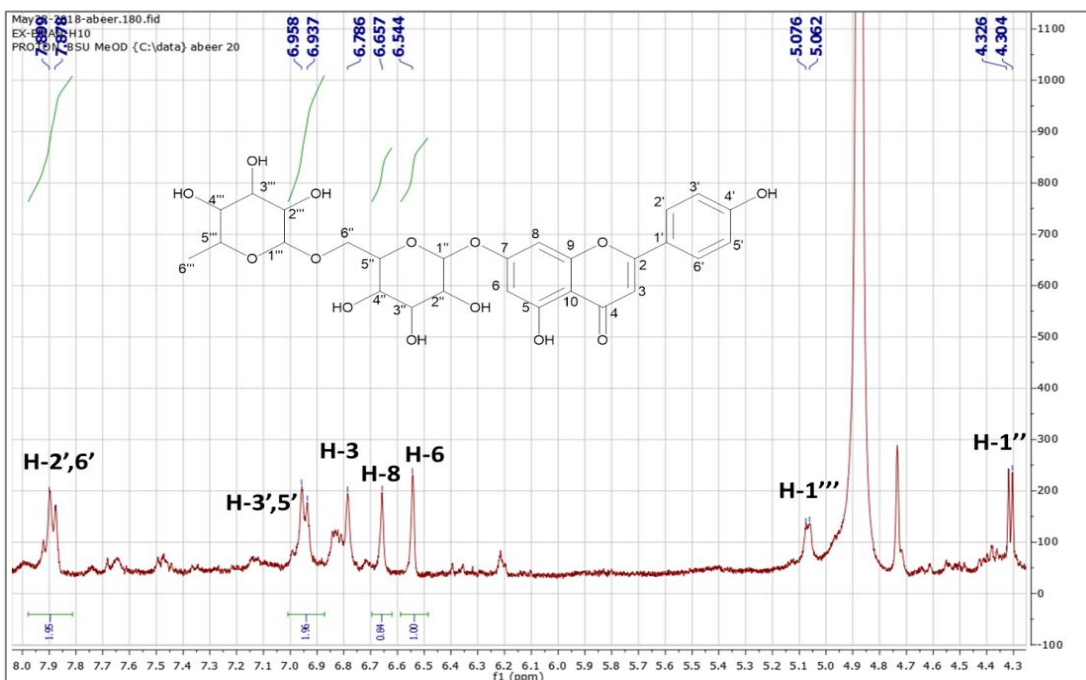

**Figure S6.C:** Expanded  $^1\text{H}$ -NMR spectrum of Apigenin-7-O-rutinoside ( $\text{CD}_3\text{OD}$ , 400 MHz)

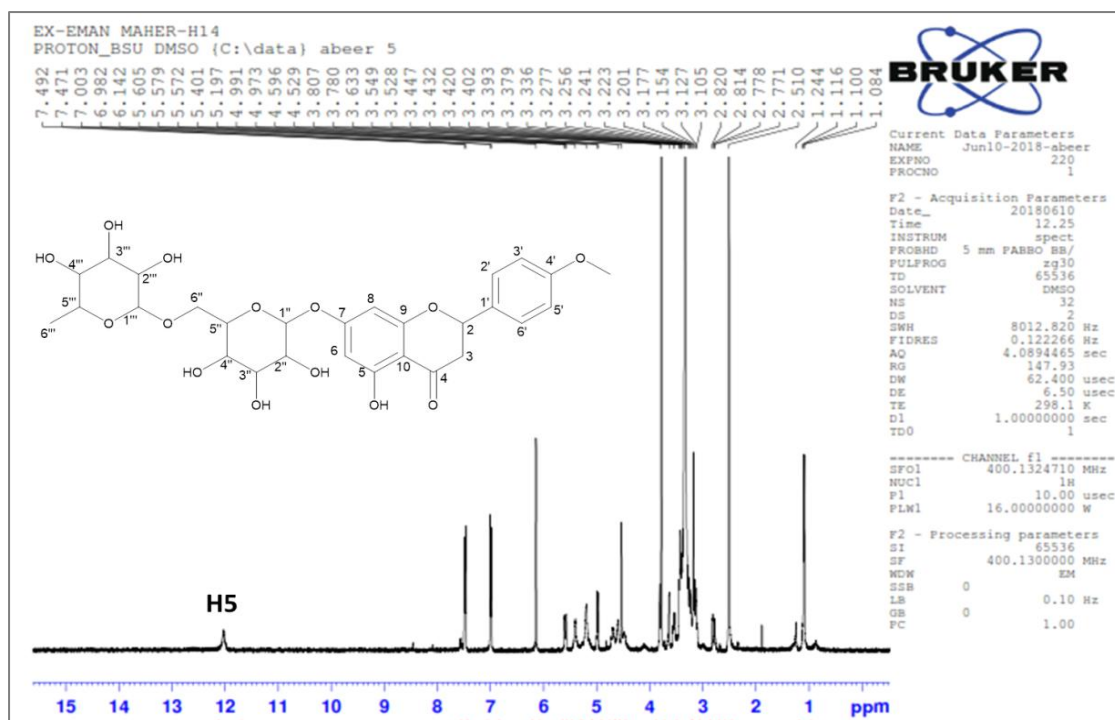

**Figure S7.A:**  $^1\text{H}$ -NMR spectrum of Didymine ( $\text{CD}_3\text{OD}$ , 400 MHz)

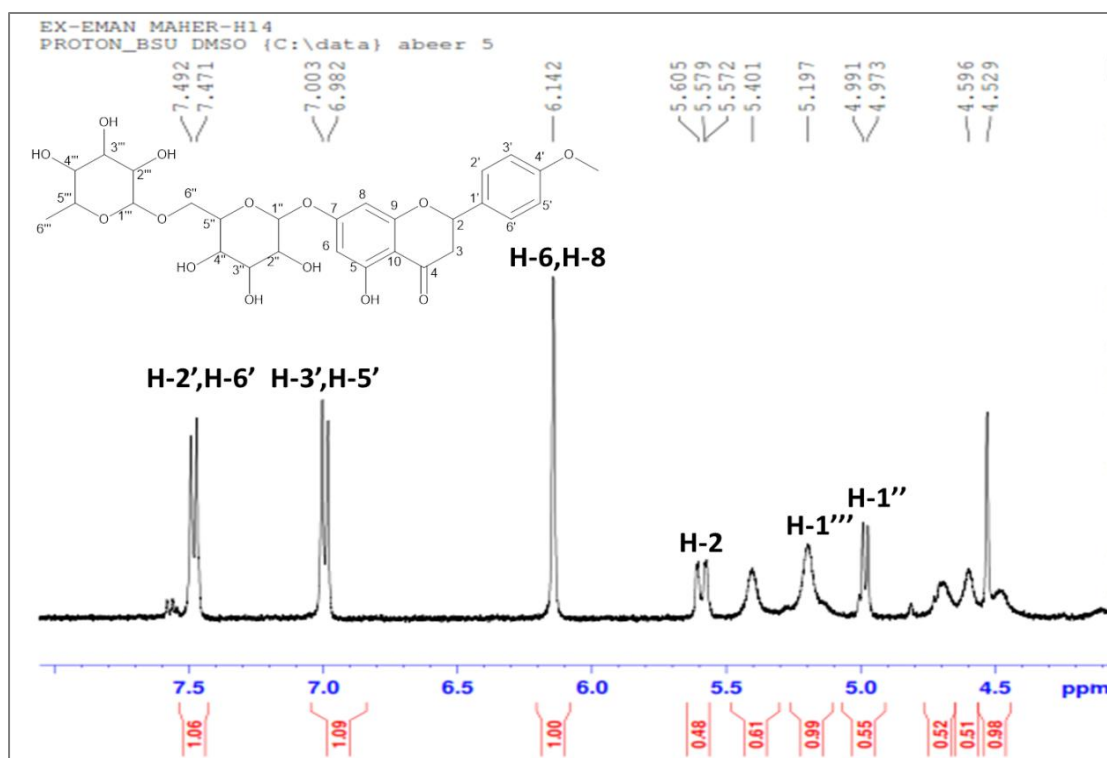

**Figure S7.B:** Expanded  $^1\text{H}$ -NMR spectrum of Didymine ( $\text{CD}_3\text{OD}$ , 400 MHz)

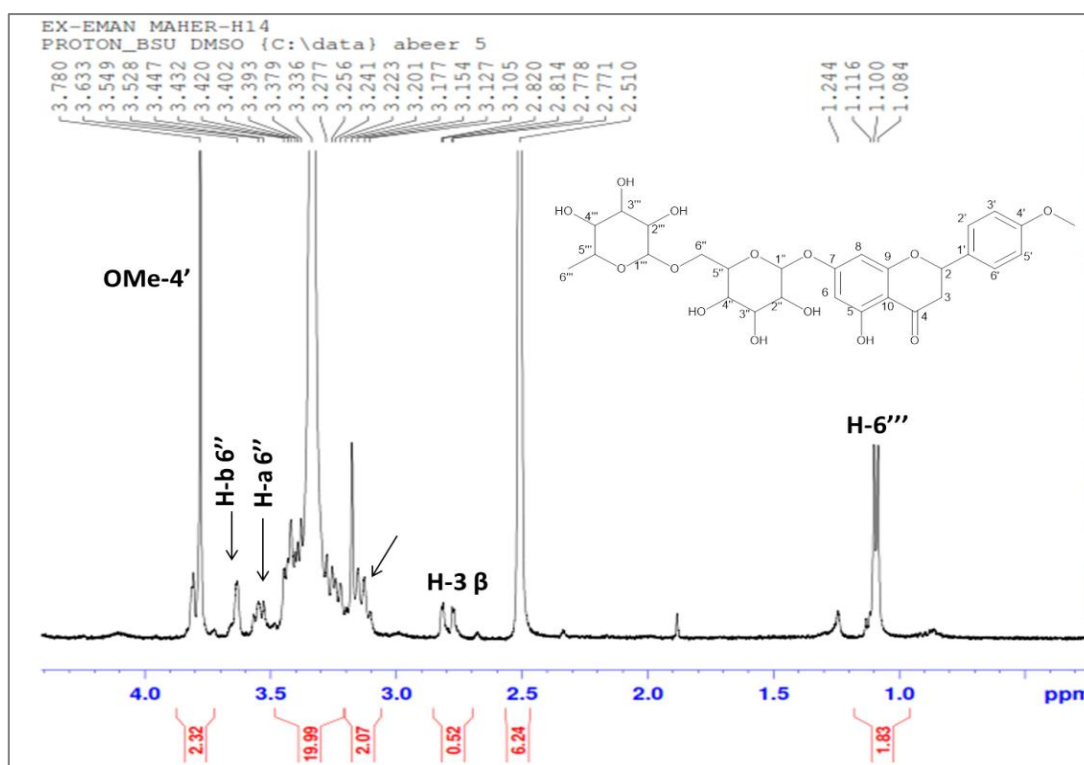

**Figure S7.C:** Expanded  $^1\text{H}$ -NMR spectrum of Didymine ( $\text{CD}_3\text{OD}$ , 400 MHz)

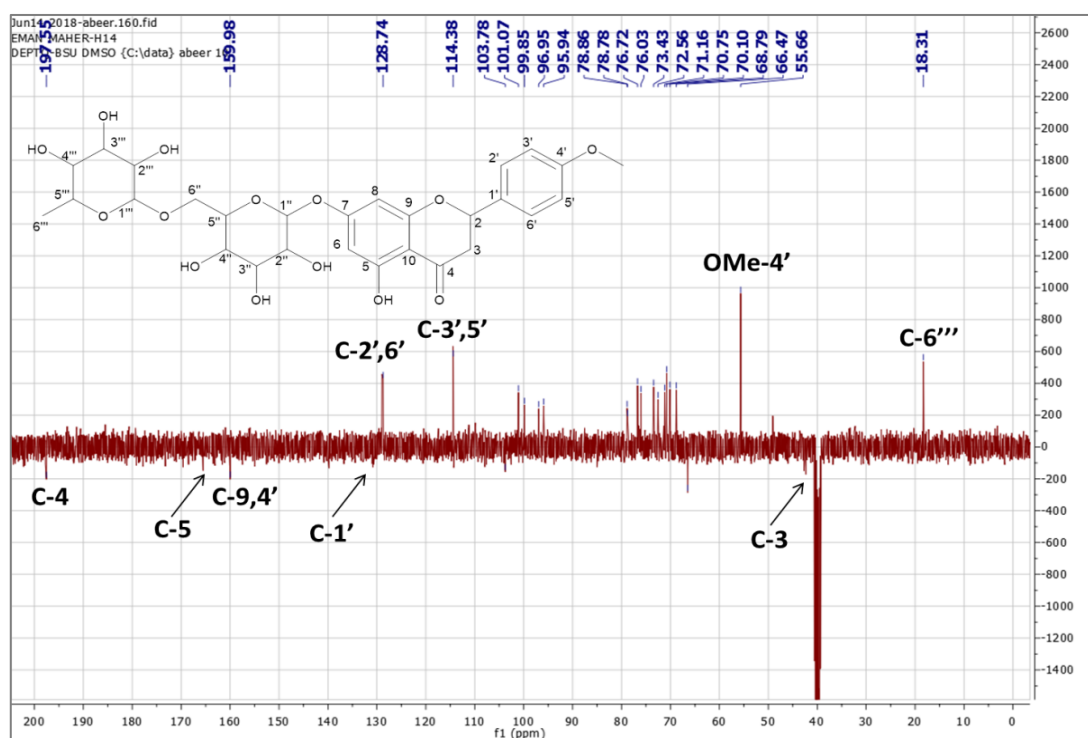

**Figure S7.D:** DEPT-Q spectrum of Didymine ( $\text{CD}_3\text{OD}$ , 100 MHz)

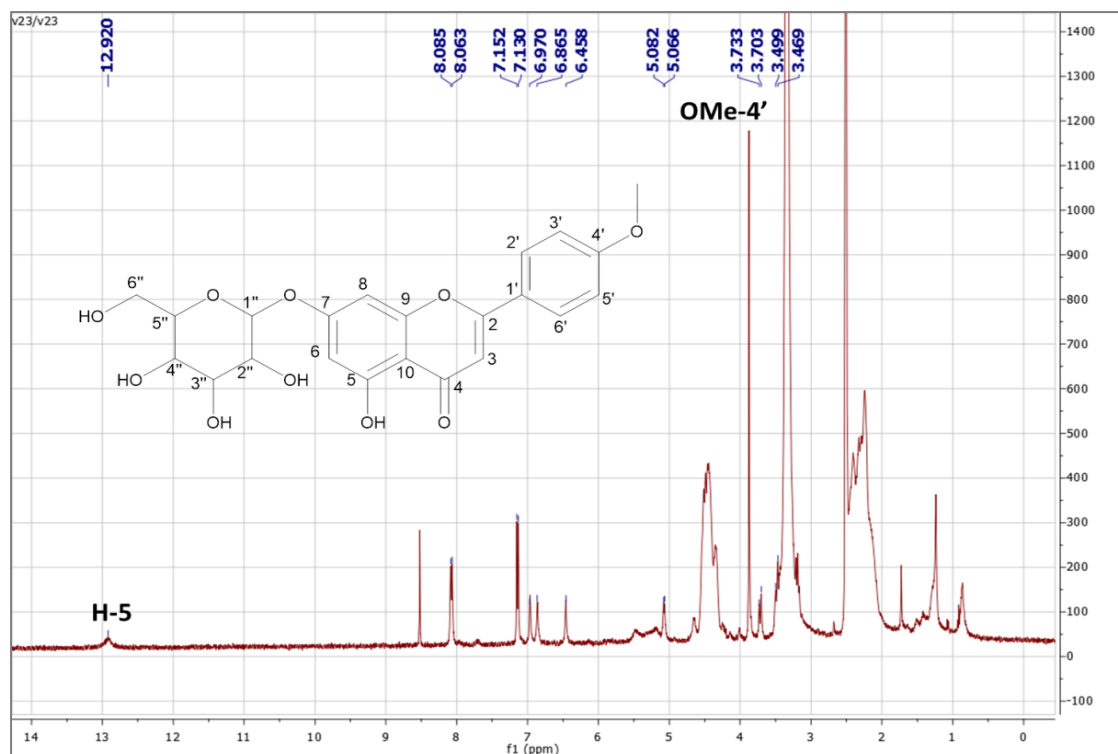

**Figure S8.A:**  $^1\text{H}$ -NMR spectrum of Acacetin-7-O-glucoside ( $\text{DMSO-d}_6$ , 400 MHz)

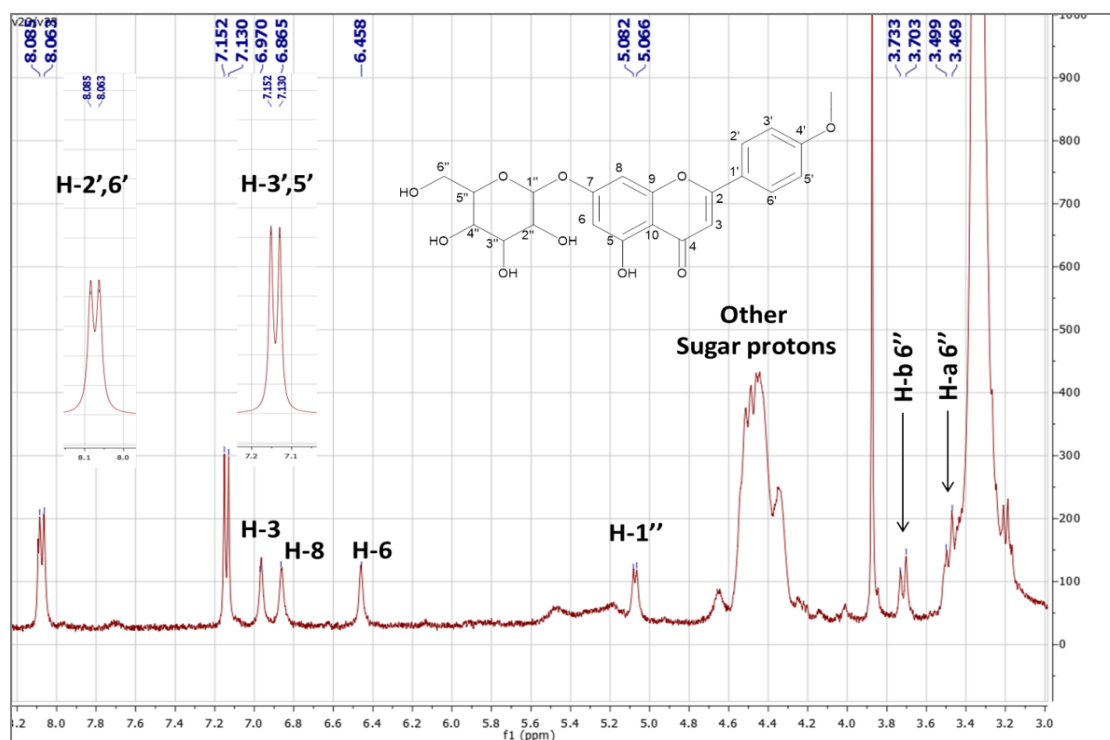

**Figure S8.B:** Expanded  $^1\text{H}$ -NMR spectrum of Acacetin-7-O-glucoside ( $\text{DMSO-d}_6$ , 400 MHz)

287 **Table S3: summary of predictions made by SwissADME web tool for the isolated compounds from *O. forskolei* Benth.**

| Cp. | Fr. C3 | R.b | TPSA  | XLOGP3 | E. L  | GI abs. | BBB P. | L.v. | B.s. | P.a | B.a | Cy |
|-----|--------|-----|-------|--------|-------|---------|--------|------|------|-----|-----|----|
| 1   | 0      | 1   | 77.76 | 1.15   | -1.86 | High    | No     | 0    | 0.56 | 1   | 1   | No |
| 5   | 0.5    | 6   | 108.6 | 0.03   | -1.68 | High    | No     | 0    | 0.55 | 0   | 1   | No |
| 6   | 0      | 4   | 118.2 | 2.72   | -3.62 | High    | No     | 0    | 0.56 | 1   | 3   | No |
| 7   | 0.17   | 13  | 289.0 | 3.92   | -6.25 | Low     | No     | 3    | 0.11 | 1   | 2   | No |
| 9   | 0.15   | 9   | 211.2 | 2.78   | -4.68 | Low     | No     | 3    | 0.11 | 1   | 2   | No |
| 10  | 0.29   | 3   | 66.3  | -0.15  | -1.7  | High    | No     | 2    | 0.17 | 1   | 1   | No |
| 13  | 0.65   | 2   | 97.99 | 3.6    | -4.31 | High    | No     | 0    | 0.56 | 1   | 1   | No |
| 15  | 0.06   | 2   | 79.9  | 3.35   | -4.14 | High    | No     | 0    | 0.55 | 0   | 0   | No |
| 16  | 0.16   | 8   | 133.5 | 2.69   | -3.66 | High    | No     | 0    | 0.55 | 1   | 3   | No |
| 17  | 0.1    | 3   | 66.76 | 1.48   | -2.1  | High    | Yes    | 0    | 0.55 | 1   | 2   | No |
| 18  | 0      | 1   | 78.76 | 1.34   | -1.86 | High    | No     | 0    | 0.56 | 1   | 1   | No |
| 19  | 0.41   | 4   | 134.9 | 1.48   | -3.48 | High    | No     | 0    | 0.55 | 0   | 0   | No |

288 \*Cp. Compound no., Fr. C3: Fraction Csp<sup>3</sup>, R.b.: Rotatable bonds, E. L: ESOL logs, GI abs.: absorption, BBB P. BBB permeability, L.V. Lipinski  
 289 violations, B.s.: bioavailability score, P.a. PAINS alerts, P.a. Brenk alerts, CY: CYP2C19. Inhibitor.

290 **Table S4. Docking results of the isolated compounds from ethyl acetate fraction, tetracaine and lidocaine with the sodium channel protein.**  
 291 Scores are provided in Kcal/mol, along with the main interactions and the corresponding interacting amino acids. In the case of H-bonds, the  
 292 lengths of the bond is provided in angstrom, and the role of the compound is mentioned (donor/acceptor).

| Compound                       | Score<br>(Kcal/mol) | Type of interaction | Main interacting<br>amino acid | Length of the bond<br>(angstrom) | Role of ligand in in case of<br>H-bond |
|--------------------------------|---------------------|---------------------|--------------------------------|----------------------------------|----------------------------------------|
| <b>Tetracaine</b>              | --6.0               | H-bond              | Gln 249                        | 2.92                             | Acceptor                               |
| <b>Acacetin</b>                | -5.7                | hydrophobic         | PHE 315<br>GLN 249             | NA                               | NA                                     |
| <b>Acacetin-7-O-glucoside</b>  | -7.0                | H-bond              | ASN 315                        | 3.12                             | Acceptor                               |
|                                |                     | $\pi$ -H            | GLN 249                        | 3.48                             | NA                                     |
| <b>Prunin</b>                  | -9.0                | H-bond              | GLN 249                        | 2.95                             | Acceptor                               |
|                                |                     | $\pi$ -H            | PHE 315                        | 4.19                             | NA                                     |
| <b>Apigenin-7-O-rutinoside</b> | -8.2                | H-bond              | CYS 248                        | 2.9                              | Donor                                  |
|                                |                     | H-bond              | ASN 315                        | 3.13                             | Acceptor                               |
|                                |                     | $\pi$ -H            | LEU 319                        | 4.12                             | NA                                     |
| <b>Chlorogenic acid</b>        | -6.2                | $\pi$ -H            | GLN 249                        | 3.86                             | NA                                     |
| <b>citrusin C</b>              | -5.8                | $\pi$ -H            | PHE 315                        | 4.05                             | NA                                     |
| <b>Dehydrodieugenol B</b>      | -6.2                | mainly hydrophobic  | VAL 319<br>GLN 249<br>PHE 315  | NA                               | NA                                     |



|                            |      |               |         |      |          |
|----------------------------|------|---------------|---------|------|----------|
| <b>Didymin</b>             | -8.3 | H-bond        | GLN 249 | 3.17 | Acceptor |
|                            |      | $\pi$ -H      | GLY 249 | 4.72 | NA       |
| <b>lidocaine</b>           | -5.3 | H-bond        | GLN 249 | 2.76 | Acceptor |
|                            |      | $\pi$ - $\pi$ | PHE 315 | 3.92 | NA       |
| <b>lithospermic acid</b>   | -8.1 | $\pi$ -H      | GLN 249 | 3.77 |          |
| <b>methyl caffeate</b>     | -4.7 | H-bond        | SER 315 | 2.88 | Donor    |
| <b>methyl gallate</b>      | -4.6 | $\pi$ -H      | PHE 315 | 4.15 | NA       |
|                            |      | $\pi$ -H      | PHE 315 | 3.95 |          |
| <b>methyl rosmarinat</b>   | -7.0 | H-bond        | CYS 248 | 4.36 | Donor    |
| <b>orientin</b>            | -6.6 | H-bond        | THR 247 | 2.92 | Donor    |
|                            |      | H-bond        | THR 248 | 3.38 | Donor    |
|                            |      | H-bond        | GLN 249 | 3.35 | Acceptor |
| <b>protocatechuic acid</b> | -4.4 | H-bond        | GLN 249 | 3.12 | Donor    |
|                            |      | H-bond        | THR 247 | 3.09 | Donor    |
|                            |      | $\pi$ -H      | GLN 249 | 3.65 | NA       |
| <b>Rabdosiin</b>           | -9.4 | H-bond        | CYS 248 | 3.07 | Donor    |
|                            |      | H-bond        | GLN 249 | 2.98 | Acceptor |
|                            |      | $\pi$ -H      | PHE 315 | 4.1  | NA       |
| <b>Rosmanol</b>            | -4.9 | H-bond        | SER 315 | 2.91 | Donor    |
|                            |      | H-bond        | SER 315 | 2.6  | Donor    |
|                            |      | H-bond        | PHE 315 | 3.13 | Acceptor |

|                            |      |               |         |      |       |
|----------------------------|------|---------------|---------|------|-------|
| <b>Rutin</b>               | -8.3 | H-bond        | THR 248 | 3.45 | Donor |
|                            |      | $\pi$ - $\pi$ | PHE 315 | 3.88 | NA    |
| <b>salvianolic acid F</b>  | -5.6 | H-bond        | THR 247 | 3    | Donor |
|                            |      | H-bond        | CYS 248 | 2.86 | Donor |
| <b>tournefollic acid B</b> | -5.4 | H-bond        | CYS 248 | 3.12 | Donor |
|                            |      | H-bond        | THR 247 | 3.19 | Donor |

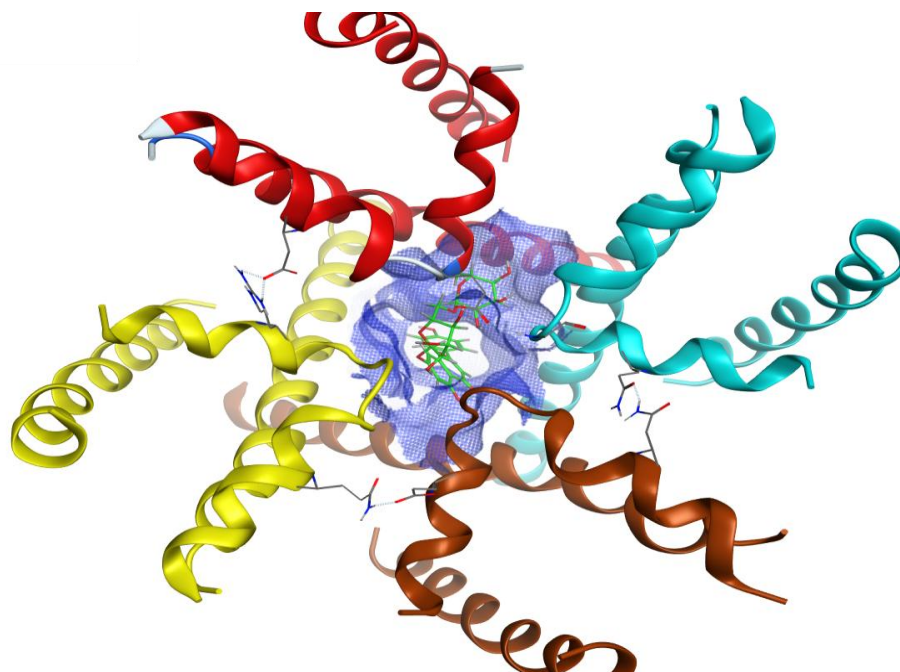

**Figure S9.** The sodium channel showing Apigenin-7-o-rutinoside in the active site

296 **References**

- 297 Barros L, Dueñas M, Dias MI, Sousa MJ, Santos-Buelga C, Ferreira IC. 2013. Phenolic  
298 profiles of cultivated, in vitro cultured and commercial samples of *Melissa officinalis*  
299 L. infusions. *Food chemistry*.136:1-8.
- 300 Bilal A, Jahan N, Ahmed A, Bilal SN, Habib S, Hajra S. 2012. Phytochemical and  
301 pharmacological studies on *Ocimum basilicum* Linn-A review. *International Journal of*  
302 *Current Research and Review*.4.
- 303 CCGI M. 2016. Molecular Operating Environment (MOE), 2013.08. Chemical  
304 Computing Group Inc, Montreal.
- 305 Chakraborty A, Devi B, Sanjebam R, Khumbong S, Thokchom I. 2010. Preliminary  
306 studies on local anesthetic and antipyretic activities of *Spilanthes acmella* Murr. in  
307 experimental animal models. *Indian Journal of Pharmacology*.42:277.
- 308 Daina A, Michielin O, Zoete V. 2017. SwissADME: a free web tool to evaluate  
309 pharmacokinetics, drug-likeness and medicinal chemistry friendliness of small  
310 molecules. *Scientific reports*.7:42717.
- 311 Elsayed Y, Refaat J, Abdelmohsen U, Othman E, Stopper H, Fouad M. 2018.  
312 Metabolomic profiling and biological investigation of the marine sponge-derived  
313 bacterium *Rhodococcus* sp. UA13. *Phytochemical Analysis*. 04/19;29.
- 314 Estrada-Reyes R, Martinez-Vazquez M, Gallegos-Solís A, Moreno J. 2010. Depressant  
315 effects of *Clinopodium mexicanum* Benth. Govaerts (Lamiaceae) on the central  
316 nervous system. *Journal of ethnopharmacology*. 03/01;130:1-8.
- 317 Flegkas A, Milosević Ifantis T, Barda C, Samara P, Tsitsilonis O, Skaltsa H. 2019.  
318 Antiproliferative Activity of (-)-Rabdosiin Isolated from *Ocimum sanctum* L.  
319 *Medicines*.6:37.
- 320 Gomes RA, Ramirez RR, Maciel JKdS, Agra MdF, Souza MdFVd, Falcão-Silva VS,  
321 Siqueira-Junior JP. 2011. Phenolic compounds from *Sidastrum micranthum* (A. St.-  
322 Hil.) fryxell and evaluation of acacetin and 7, 4'-Di-O-methylisoscutearein as  
323 modulator of bacterial drug resistance. *Química Nova*.34:1385-1388.
- 324 Grayer RJ, Kite GC, Veitch NC, Eckert MR, Marin PD, Senanayake P, Paton AJ. 2002.  
325 Leaf flavonoid glycosides as chemosystematic characters in *Ocimum*. *Biochemical*  
326 *systematics and ecology*.30:327-342.
- 327 Guerrero IC, Andrés LS, León LG, Machín RP, Padrón JM, Luis JG, Delgadillo J. 2006.  
328 Abietane diterpenoids from *Salvia pachyphylla* and *S. clevelandii* with cytotoxic  
329 activity against human cancer cell lines. *Journal of natural products*.69:1803-1805.
- 330 Ibrahim AH, Attia EZ, Hajjar D, Anany MA, Desoukey SY, Fouad MA, Kamel MS,  
331 Wajant H, Gulder TAM, Abdelmohsen UR. 2018. New Cytotoxic Cyclic Peptide from  
332 the Marine Sponge-Associated *Nocardopsis* sp. UR67. *Marine drugs*.16:290.
- 333 Leal F, Taghouti M, Nunes F, Silva A, Coelho AC, Matos M. 2017. *Thymus* Plants: A  
334 Review—Micropropagation, Molecular and Antifungal Activity. *Active ingredients*  
335 *from aromatic and medicinal plants*.107-126.
- 336 Martins N, Barros L, Santos-Buelga C, Henriques M, Silva S, Ferreira IC. 2014.  
337 Decoction, infusion and hydroalcoholic extract of *Origanum vulgare* L.: different  
338 performances regarding bioactivity and phenolic compounds. *Food*  
339 *Chemistry*.158:73-80.
- 340 Mimica-Dukic N, Bozin B. 2008. *Mentha* L. species (Lamiaceae) as promising sources  
341 of bioactive secondary metabolites. *Current Pharmaceutical Design*.14:3141-3150.

- 342 Mondal S, Mirdha BR, Mahapatra SC. 2009. The science behind sacredness of Tulsi  
 343 (*Ocimum sanctum* Linn.). *Indian J Physiol Pharmacol*.53:291-306.
- 344 Pereira OR, Peres AM, Silva AM, Domingues MR, Cardoso SM. 2013. Simultaneous  
 345 characterization and quantification of phenolic compounds in *Thymus x citriodorus*  
 346 using a validated HPLC–UV and ESI–MS combined method. *Food research*  
 347 *international*.54:1773-1780.
- 348 Sharma P, Prakash O, Shukla A, Singh Rajpurohit C, G Vasudev P, Luqman S, Kumar  
 349 Srivastava S, Bhushan Pant A, Khan F. 2016. Structure-activity relationship studies on  
 350 holy basil (*Ocimum sanctum* L.) based flavonoid orientin and its analogue for  
 351 cytotoxic activity in liver cancer cell line Hepg2. *Combinatorial chemistry & high*  
 352 *throughput screening*.19:656-666.
- 353 Shoeb M, Jaspars M, MacManus SM, Celik S, Nahar L, Kong-Thoo-Lin P, Sarker SD.  
 354 2007. Anti-colon cancer potential of phenolic compounds from the aerial parts of  
 355 *Centaurea gigantea* (Asteraceae). *Journal of natural medicines*.61:164.
- 356 Singh D, Chaudhuri PK. 2018. A review on phytochemical and pharmacological  
 357 properties of Holy basil (*Ocimum sanctum* L.). *Industrial Crops and*  
 358 *Products*.118:367-382.
- 359 Suzuki A, Shiota O, Mori K, Sekita S, Fuchino H, Takano A, Kuroyanagi M. 2009.  
 360 Leishmanicidal active constituents from Nepalese medicinal plant Tulsi (*Ocimum*  
 361 *sanctum* L.). *Chemical and Pharmaceutical Bulletin*.57:245-251.
- 362 Tada H, Murakami Y, Omoto T, Shimomura K, Ishimaru K. 1996. Rosmarinic acid and  
 363 related phenolics in hairy root cultures of *Ocimum basilicum*.  
 364 *Phytochemistry*.42:431-434.
- 365 Tawfike A, Attia EZ, Desoukey SY, Hajjar D, Makki AA, Schupp PJ, Edrada-Ebel R,  
 366 Abdelmohsen UR. 2019. New bioactive metabolites from the elicited marine sponge-  
 367 derived bacterium *Actinokineospora spheciospongiae* sp. nov. *AMB Express*.9:12.
- 368 Tikhonov DB, Zhorov BS. 2017. Mechanism of sodium channel block by local  
 369 anesthetics, antiarrhythmics, and anticonvulsants. *The Journal of general*  
 370 *physiology*.149:465-481.
- 371 Yu Y, Xing N, Xu X, Zhu Y, Wang S, Sun G, Sun X. 2019. Tournefollic acid B, derived  
 372 from *Clinopodium chinense* (Benth.) Kuntze, protects against myocardial  
 373 ischemia/reperfusion injury by inhibiting endoplasmic reticulum stress-regulated  
 374 apoptosis via PI3K/AKT pathways. *Phytomedicine*.52:178-186.
- 375 Zahran EM, Abdelmohsen UR, Hussein AS, Salem MA, Khalil HE, Yehia Desoukey S,  
 376 Fouad MA, Kamel MS. 2019. Antiulcer potential and molecular docking of flavonoids  
 377 from *Ocimum forskolei* Benth., family Lamiaceae. *Natural product research*.1-5.  
 378 <https://doi.org/10.1080/14786419.2019.1645662>

379
